1           **GENOMIC INSIGHTS OF AN ANDEAN MULTI-RESISTANT SOIL**  
2           **ACTINOBACTERIUM OF BIOTECHNOLOGICAL INTEREST**

3

4 Daniel Alonso-Reyes<sup>1</sup>; Fátima Silvina Galván<sup>1</sup>, Luciano Raúl Portero<sup>1</sup>; Natalia Noelia  
5 Alvarado<sup>1</sup>; María Eugenia Farías<sup>2</sup>; Martín P. Vazquez<sup>3</sup>; Virginia Helena Albarracín<sup>1,4\*</sup>

6 <sup>1</sup>Laboratorio de Microbiología Ultraestructural y Molecular, Centro Integral de  
7 Microscopía Electrónica (CIME), Facultad de Agronomía y Zootecnia, UNT y  
8 CONICET, Tucumán, Argentina

9 <sup>2</sup>Laboratorio de Investigaciones Microbiológicas de Lagunas Andinas (LIMLA), Planta  
10 Piloto de Procesos Industriales y Microbiológicos (PROIMI), CCT, CONICET,  
11 Tucumán, Argentina.

12 <sup>3</sup>HERITAS-CONICET, Ocampo 210 bis, Predio CCT, Rosario, 2000, Santa Fe.

13 <sup>4</sup>Facultad de Ciencias Naturales e Instituto Miguel Lillo, Universidad Nacional de  
14 Tucumán, Tucumán, Argentina.

15 **Running headline: ANDEAN MULTI-RESISTANT SOIL ACTINOBACTERIUM**

16 **Keywords:** NESTERENKONIA, SOIL, PUNA, GENOMICS, EXTREMOPHILES,  
17 BIOTECHNOLOGY

18

19       \*Corresponding author:

20       Virginia Helena Albarracín, Centro Integral de Microscopía Electrónica (CIME,  
21 CONICET, UNT) Camino de Sirga s/n. FAZ, Finca El Manantial, Yerba Buena (4107).  
22 Tucumán, Argentina. E-mail: [cime@tucuman-conicet.gov.ar](mailto:cime@tucuman-conicet.gov.ar)

23 **HIGHLIGHTS**

24 - Arid Andean Soils are attractive sources of microbial strains useful in  
25 biotechnological processes.

26 - Physiological studies revealed the multi-resistant nature of the poly-extremophile  
27 *Nesterenkonia sp. Act20*.

28 - Act20's genome analysis showed a complete set of genes coding for proteins  
29 involved in resistance to multiple stresses, including extremoenzymes and  
30 extremolytes.

31

32

33 **ABSTRACT**

34 Central Andean Ecosystems (between 2000 and 6000 masl) are typical arid to  
35 semiarid environments suffering from the highest total solar and UVB radiation on the  
36 planet but displaying numerous salt flats and shallow lakes. Isolated from these  
37 environments, Andean Microbial Communities (AME) of exceptional biodiversity  
38 endures multiple severe conditions. Also, the poly-extremophilic nature of AME's  
39 microbes indicates the potential for biotechnological applications. In this context, the  
40 presented study used genome mining and physiological characterization to reveal the  
41 multi-resistant profile of *Nesterenkonia sp. Act20*, an actinobacterium isolated from the  
42 soil surrounding Lake Socompa, Salta, Argentina (3570 m). UV-B, desiccation, and  
43 copper assays showed the strain's exceptional resistance to all these factors. Act20's  
44 genome presented coding sequences involving antibiotics, low temperatures, UV and  
45 arsenic resistance, nutrient limiting conditions, osmotic stress response, low  
46 atmospheric oxygen pressure, heavy metal stress, and resistance to fluoride and chlorite.  
47 Act20 can also synthesize proteins and natural products such as an insecticide, bacterial  
48 cellulose, ectoine, bacterial hemoglobin, and even antibiotics like colicin V and  
49 aurachin C. We also found numerous enzymes for animal and vegetal biomass  
50 degradation and application in other industrial processes .

51 The herein report shed light on the microbial adaptation to high-altitude  
52 environments, its possible extrapolation for studying other extreme environments of  
53 relevance, and its application to industrial and biotechnological processes.

54

55

56

## 57 INTRODUCTION

58 Central Andean Ecosystems (between 2000 and 6000 masl) are typical arid to  
59 semiarid environments suffering from the highest total solar and UVB radiation on the  
60 planet, displaying numerous salt flats and shallow lakes (Albarracín et al., 2016, 2015).  
61 Spanning from the Atacama Desert in Chile, through the Argentinean and Bolivian  
62 Puna up to the Peruvian Andes, these ecosystems experience a wide daily temperature  
63 range, high salinity (up to 30%), scarce nutrient availability and high concentration of  
64 heavy metals and metalloids, especially arsenic (Albarracín et al., 2016, 2015).

65 Despite these conditions, Andean Microbial Communities (AME) prove  
66 exceptional biodiversity and diverse strategies for enduring these severe conditions  
67 (Albarracín et al., 2016, 2015; Solon et al., 2018). Likewise, the importance of  
68 exploiting AME poly-extremophiles' full potential in terms of their biotechnological  
69 applications was highlighted (Albarracín and Farías, 2012). Examples are the production  
70 of waxes and fatty acids for biodiesel (Bequer Urbano et al., 2013) or compatible  
71 solutes, antioxidants, pigments, or enzymes for the pharmaceutical industry (Farias et  
72 al., 2011). Current projects heading this way have yielded detailed molecular  
73 information and functional proof on novel extremoenzymes: i.e., photolyase of  
74 *Acinetobacter sp. Ver3* (Albarracín et al., 2014), an arsenical resistance efflux pump,  
75 and a green tuned microbial rhodopsin (Albarracín et al., 2015) in *Exiguobacterium sp.*  
76 S17 (Ordoñez et al., 2015).

77 *Actinobacteria* are high GC (50-71 %), Gram-positive microbes found in both  
78 terrestrial and aquatic ecosystems (Albarracín et al., 2005; Montalvo et al., 2005). Being  
79 the soil microbiota's main component (Schrempf, 2013), *Actinobacteria* exhibit various  
80 morphologies (Ventura et al., 2007), physiological and metabolic properties, and  
81 includes many species, which are useful in biotechnology (Kurtböke, 2003). Previous

82 work using dependent and independent culture techniques revealed that *Actinobacteria*  
83 is one of the predominant taxonomical groups among the AME's microbial communities  
84 (Dib et al., 2008, 2009; Rasuk et al., 2017). Moreover, AME's *Actinobacteria* have been  
85 demonstrated to carry giant linear plasmids that may involve the community's spread of  
86 resistance traits (Dib et al., 2010). AME's actinobacteria also showed their potential for  
87 producing secondary metabolites useful for the pharmacy industry. Wichner et al.  
88 (2017) reported that the extremotolerant isolate, *Lentzea* sp H45, synthesized new  
89 monoene, and diene glycosides. These natural products called lentzeosides A-F possess  
90 inhibitory activity against HIV integrase, a key enzyme for recombining the HIV  
91 genome into the host genome. Schulz et al. (2011) evidenced the production of  
92 bioactive compounds called abenquines (simple aminobenzoquinones substituted by  
93 different amino acids) by *Streptomyces* sp. DB634. Abenquines showed moderate  
94 inhibitory activity against phosphodiesterase type 4 (PDE4b) while proved useful for  
95 treating inflammatory diseases. Moreover, *Streptomyces* C38 produces 22-membered  
96 macrolactonic antibiotics atacamycin A-C, also considered drugs for treating  
97 inflammatory diseases by inhibiting PDE4b and antitumor by acting against tumor cell  
98 lines (Nachtigall et al., 2011).

99 *Nesterenkonia* is a particular genus (Stackebrandt et al., 1995) with most  
100 representatives isolated from hypersaline or alkaline environments such as saline soil,  
101 solar salt, seafood, soda lake, or alkaline wastewater. Halophiles are exploitable  
102 microorganisms for bioprocesses (Fu et al., 2014; Liu et al., 2019; Yin et al., 2014)  
103 (Yue et al., 2014). For example, *Nesterenkonia* MSA 31 isolated from a marine sponge  
104 *Fasciospongia cavernosa* produces a halo-alkali and thermal tolerant biosurfactant  
105 useful as an emulsifier stabilizing agent in the food industry (Kiran et al., 2017).  
106 Furthermore, *Nesterenkonia* sp. strain F isolated from Aran-Bidgol Lake (Iran) can

107 produce acetone, butanol, ethanol, acetic, and butyric acids under aerobic and anaerobic  
108 conditions (Amiri et al., 2016). Also, *Nesterenkonia lacusekhoensis* *EMLA3* degrades  
109 reactive violet 1 (RV1), a toxic azo dye, under conditions of high pH and in the  
110 presence of a high concentration of NaCl, both of which generally inhibit microbial  
111 treatment process (Prabhakar et al., 2019). Thus, *Nesterenkonia* strains are attractive  
112 microbes in the search for biotechnological resources.

113 In a previous screening for extremophilic *Actinobacteria* from Puna arid alkaline  
114 soil, the dark yellow-pigmented *Nesterenkonia* sp. Act20 strain was identified (Rasuk et  
115 al., 2017). Act20 grew at a high concentration of NaCl (25%), Na<sub>2</sub>CO<sub>3</sub> (5mM), and  
116 arsenic (up to 200mM arsenate), in a wide range of pH 5-12, with optimal growth at  
117 alkaline pH (Rasuk et al., 2017). In subsequent works, our group evidenced that  
118 *Nesterenkonia* sp Act20 had a high tolerance to UV-B (up to 100 kJ/m<sup>2</sup>) due to an  
119 integrated response to radiation called UV-resistome (Portero et al., 2019).

120 The following work aims to test the multi-resistance of the Act20 strain  
121 combining phenotypic profiling with in-depth genomic analysis. Also, we highlight the  
122 potential for biotechnological use of extremozymes and extremolytes coded in its  
123 genome.

124

## 125 1. MATERIALS AND METHODS

126 **2.1. Strains and culture conditions.** UV-resistant strain Act20 used in this study was  
127 previously isolated from soil around Lake Socompa (3,570 m) at the Andean Puna in  
128 Argentina (Albarracín et al., 2016, 2015) and belongs to the LIMLA-PROIMI  
129 Extremophilic Strain Collection. Bacterial strain *Nesterenkonia halotolerans* DSM  
130 15474 belongs to DSMZ Bacterial Culture Collection, and we used it as a control  
131 following previously reported works (Rasuk et al., 2017). Both strains were grown in an

132 "H" medium (a medium modified for halophiles, containing NaCl 15 g L<sup>-1</sup>, KCl 3 g L<sup>-1</sup>,  
133 MgSO<sub>4</sub> 5 g L<sup>-1</sup>, sodium citrate 3 g L<sup>-1</sup>) added with 2% agar when applicable.

134 **2.2. Multi-resistance assays.** The resistance of strain Act20 cells to diverse physical  
135 and chemical stresses was tested when exposed to increasing concentrations of copper,  
136 high UV doses, and desiccation treatments. For studying the response to desiccation,  
137 cells were first grown aerobically at 30 °C overnight in a 10 ml nutrient broth medium  
138 on a rotary shaker. Cells were harvested, washed once with sterile NaCl solution (0.85  
139 %, w/v), and resuspended to reach an OD<sub>600nm</sub> of 2 (±0.1) in NaCl solution.  
140 Approximately 20 aliquots (100 µl each) from this cell suspension were spotted onto  
141 0.45-µm filters (Sartorius, Göttingen, Germany). These filters were placed onto agar  
142 medium H plates and incubated at 30 °C for five days. The colonies were then let dry by  
143 incubation in empty sterile dishes at 25 °C and 18% of relative humidity for 50 days,  
144 and the viable count (CFU) was assessed at different times. The filters on which the  
145 strains were grown were added to sterile microcentrifuge tubes. The cells from each  
146 filter were resuspended separately, and the CFU was determined before and after  
147 desiccation treatment. The tolerance to desiccation was determined in Act20 and *N.*  
148 *halotolerans* DSM 15474 as control.

149 Resistance to UV irradiation and copper salts were tested by a quick qualitative  
150 method. For the copper resistance profile assays, aliquots of 5 µL of an overnight  
151 (OD<sub>600</sub>≈0.6) culture were loaded onto H medium agar plates supplemented with 1, 2, or  
152 3 mM CuSO<sub>4</sub>. The control cultures consisted of an "H" medium without copper  
153 supplementation. Then they were incubated for 72 h at 30 °C under continuous PAR  
154 luminosity conditions with an OSRAM 100 W lamp.

155 For the UV resistance assays, the cells were pre-culture on liquid medium H, and  
156 once at OD<sub>600nm</sub> = 0,6 collected for serial dilutions. Aliquots of 5 µL were then loaded

157 onto medium agar plates and immediately exposed to UV-B irradiation (Vilbert  
158 Lourmat VL-4, the maximum intensity at 312 nm) 5 min (1,7 KJ m<sup>-2</sup>), 15 min (5,1 KJ m<sup>-2</sup>)  
159 <sup>2</sup>), and 30 min (10,4 KJ m<sup>-2</sup>). Then they were incubated for 72 h at 30 °C in the dark to  
160 prevent photoreactivation. UV-B irradiance was quantified with a radiometer (Vilbert  
161 Lourmat model VLX-3W) coupled with a UV-B sensor (Vilbert Lourmat model CX-  
162 312). The minimal intensity measured was 5,21 W m<sup>-2</sup>, and maximal power was 5,4 W  
163 m<sup>-2</sup>. Controls of unexposed samples were run simultaneously in the dark.

164           Microbial growth was recorded with tree signs (+++) when similar to the growth  
165 in controls, two signs (++) when it was slightly different from the growth in the  
166 controls, one sign (1 pts) when growth was low (isolated colonies), and no sign when it  
167 was no growth at all. Parallel assays were performed for *Nesterenkonia halotolerans*  
168 DSMZ 15474 to compare resistance profiles.

### 169 **2.3. Microscopic observation and ultrastructural characterization of Act20 cells.**

170 These assays were designed to evaluate the morphology and ultrastructure of Act20 in  
171 challenging conditions similar to those present in their original environment, i.e., under  
172 high UV irradiation and chemical (copper) stress. The selected strains were grown in H  
173 medium at 30°C with shaking (180 rpm). Cells in the mid-log phase of growth were  
174 harvested by centrifugation (5000 rpm for 10 min). Pellets were washed twice in 0.9 %  
175 NaCl and were kept under starvation conditions for 18 h at 4 °C in the same solution. 20  
176 ml of cell suspension was transferred to a sterile plate and were exposed to UV-B  
177 irradiation at different times, as indicated before. Copper-challenged cultures were  
178 likewise obtained by growing the cells in H medium with and without 3 mM Cu.

179           For scanning electron microscopy (SEM) and transmission electron microscopy  
180 (TEM), 100 µL aliquots were collected for each different treatment and centrifuged



181 (5,000 rpm for 10 min) to remove the supernatant. The pellets were immediately fixed  
182 with Karnovsky's fixative (a mixture of 2,66% paraformaldehyde and 1,66%  
183 glutaraldehyde) in a 0.1 M phosphate buffer pH 7.3, for 48 h at 4°C. For SEM, the cells  
184 were processed according to previously optimized methods (Zannier et al., 2019).  
185 Briefly, aliquots of 50 µl of samples fixed were placed in coverslips for electron  
186 microscopy and kept for three hours at room temperature. The samples were then  
187 dehydrated in graded ethanol (30%, 50%, 70%, 90%, and 100%) for 10 min each and  
188 finally maintained in acetone 100% for 40 min. The dehydration was completed with  
189 the critical drying point (Denton Vacuum model DCP-1), in which acetone was  
190 exchanged by liquid CO<sub>2</sub>. Then, samples were mounted on stubs and covered by gold  
191 (Ion Sputter Marca JEOL model JFC-1100) and observed under a Zeiss Supra 55VP  
192 (Carl Zeiss NTS GmbH, Germany) scanning electron microscope belonging to the  
193 Electron Microscopy Core Facility (CIME). For TEM, the protocol from Albarracín et  
194 al. (2008) was followed. After fixation, samples were washed twice in 0.1 M phosphate  
195 buffer, pH 7.3 (5000 rpm for 10 min), and embedded in agar (Bozzola, 2007). Agar  
196 pellets were post-fixed in 1% osmium tetroxide in phosphate buffer, pH 7.3, overnight  
197 at 4°C. After washing with the same buffer, and were stained in 2% uranyl acetate  
198 solution for 30 min at room temperature. The samples were dehydrated with ethanol  
199 solutions increasing concentrations (70%, 90%, and 100%) for 15 min each and finally  
200 maintained in acetone 100% for 30 min. After that, the infiltration and embedding in an  
201 acetone-SPURR resin sequence were carried out, followed by polymerization at 60°C  
202 for 24 h. Ultrathin sections were cut using a diamond knife on a manual ultramicrotome  
203 (Sorvall Porter-Blum Ultramicrotome MT-1). Bacteria were examined using a Zeiss  
204 LIBRA 120 (Carl Zeiss AG, Alemania) transmission electron microscope at 80 kV,  
205 belonging to the Electron Microscopy Core Facility (CIME-CONICET-UNT).

206 **2.4. Genome sequencing, assembly, and gap closure.** Genomic DNA from  
207 *Nesterenkonia sp.* Act20 strain was purified from cells grown on LB broth for 72 h at  
208 30° C and harvested by centrifugation (3,000 g for 10 min at 4°C). Pellets were washed  
209 twice with distilled water. We extracted total genomic DNA with the DNeasy Blood  
210 and Tissue Kit (Qiagen) following the manufacturer's recommendations. Whole-genome  
211 shotgun pyrosequencing was achieved using a 454 preparation kit (Roche Applied  
212 Sciences, Indianapolis, IN, USA) and sequenced with a GS-FLX using Titanium  
213 chemistry (454 Life Sciences, Roche Applied Sciences). The 454 reads were assembled  
214 with Newbler Assembler software, v. 2.5.3, with -URT option. Extra-assembling  
215 programs were run: MIRA v. 3.4.0 and Celera Assembler, v. 6.1. The different  
216 assemblages were fused using MINIMUS 2 Pipeline from the AMOS Package. The  
217 merged assembly was used as a guide for designing the primers, which were, in turn,  
218 used to confirm contig joints and close gaps. The overall sequence coverage was 37X;  
219 This Whole Genome Shotgun project has been deposited at DDBJ/ENA/GenBank under  
220 the accession JADPQH000000000. The version described in this paper is version  
221 JADPQH010000000.

222 **2.5. Genome analyses.** Genome annotation was implemented using PROKKA  
223 (Seemann, 2014) with a custom expanded protein database, which includes Swiss-Prot,  
224 TrEMBL, Pfam, SUPERFAMILY, TIGRFAM, and a genus-specific database built from  
225 GenBank files downloaded from the NCBI database. We processed the set of annotated  
226 FASTA files belonging to genomes with Proteinortho, which detects orthologous genes  
227 within different species. For doing so, the software compares similarities of given gene  
228 sequences and clusters them to find significant groups (Lechner et al., 2011).

229 **2.6. Phylogenetic analysis.** The sequence-based taxonomic analysis was performed  
230 using both 16S rDNA and whole-genome comparisons. Sequences from genomes and

231 16S rDNA were obtained from the NCBI database (Assembly and RefSeq), and their  
232 characteristics resumed in Supplementary Table S1. Some 16S rDNA were retrieved  
233 from genome sequences to link both types of analysis. Sequences from 16S rDNA were  
234 aligned with Silva Incremental Aligner (Pruesse et al., 2012), and the phylogenetic tree  
235 was created with Fasttree 2.1.7 (Price et al., 2010) with the Maximum Likelihood  
236 method using Generalized Time-Reversible (GTR) model. Subsequent processing and  
237 visualization of the tree were performed with iTOL (Letunic and Bork, 2016). Genome-  
238 wide nucleotide identity trends were explored in the genome dataset by estimating all-  
239 against-all pairwise Average Nucleotide Identity (ANI). We utilized the ANIm  
240 approach that uses MUMmer (NUCmer) to align the input sequences as implemented in  
241 pyANI (Kurtz et al., 2004). The average between any given pair was used as the final  
242 value. Heat maps were generated using the heatmap V 1.0.12 R package (Kolde, 2019).

243

## 244 **2. RESULTS**

245 **3.1. Taxonomic Affiliation of *Nesterenkonia* sp. Act20.** *Nesterenkonia* sp. Act 20 was  
246 first isolated by Rasuk et al. (2017) and initially assigned to the genus by partial 16S  
247 rDNA sequencing. This work compared the full 16S rDNA sequence from Act20 with  
248 related strains, resulting in 98.2 % identity with *N. sandarakina* YIM 70009 and 97.4 %  
249 identity with both *N. jeotgali* JG-241 and *N. halotolerans* YIM70084. The phylogenetic  
250 tree based on this marker also suggests a close relationship of Act20 with the above  
251 mentioned plus *N. sp.* AN1, *N. aurantiaca* strains, *N. sandarakina*, and *N. Lutea*,  
252 clustering together in a significant clade (Fig. 1A). The whole-genome analysis using  
253 the ANI method shows a similar pattern of relationship (Fig. 1B). In this analysis, *N. sp.*  
254 Act 20, *N. aurantiaca* DSM 27373, *N. sp.* AN1, *N. jeotgali* CD087, and *N. sandarakina*  
255 CG 35 cluster with significance, and Act20 have a lower percent average nucleotide

256 difference (defined as 100% – ANI) value than the proposed 95% threshold (Richter  
257 and Rosselló-Móra, 2009), suggesting that it could be a novel species.

258 **3.2. Multi-Resistance Profile of Act20.** Resistance to desiccation, UV, and copper was  
259 uncovered in *Nesterenkonia* sp. Act20 and compared with the closest relative, *N.*  
260 *halotolerans* (NH). A summary of this multi-resistance is presented in Table 1.  
261 Tolerance to desiccation was tested every seven days for seven weeks. Act20  
262 maintained its population in the same order of magnitude for 14 days, but from the third  
263 week on, it showed null development (Fig. S1). In turn, NH decreased its population in  
264 one order of magnitude after 7 and 14 days of treatment while it did not survive beyond  
265 14 days of continuous drying conditions.

266 Tolerance to UV radiation was tested by placing culture serial dilutions drops of  
267 the studied strains on "H" agar plates and exposing them to UV source as described  
268 previously. A similar procedure was tried for testing resistance profiles to copper salts  
269 in media amended with 1, 2, and 3 mM of copper. Our results showed that Act20 was  
270 much more resistant to radiation than the selected control strain (Fig. S2), growing even  
271 after a dose of 10,4 KJ m<sup>-2</sup> of UV-B radiation. In turn, the copper resistance profile was  
272 similarly high for both strains; Act20 and NH developed quite well even at the  
273 maximum concentration tested (3 mM).

274 **3.3. General Genomic Features.** The assembly process led to two scaffolds: the largest  
275 with 2,092,188 bp in length and G + C content of 65.98%, and the second scaffold with  
276 836,993 bp and G + C content of 65.82%. As a whole, the genome of *Nesterenkonia* sp  
277 Act20 consists of 2,930,097 bp, with a GC content of 65.9%. PROKKA annotation  
278 shows 2,672 coding sequences, including 2,377 annotated genes and 58 RNAs. Act20  
279 genomics features were compared to the other fifteen *Nesterenkonia* genomes available  
280 in the NCBI assembly database (Table S7). Supplementary Table S2 shows the

281 annotated genes of Act20, their sequence length, and functions assigned by homology,  
282 as well as the KO identifiers linked for some of these genes. A summary of the most  
283 relevant annotated functions can be found in Supplementary Tables S3 and S4.

284 **3.4. Genome traits of Act20 multi-resistance phenotype.** Genome inspection  
285 indicated genetic determinants coding for systems potentially involved in the high  
286 resistance profile observed in herein described and previous lab assays (Rasuk et al.,  
287 2017). The genome showed pathways associated with osmotic and oxidative stress  
288 response, low temperature, starvation response, and low oxygen conditions,  
289 unmistakable evidence of this microbe adaptation to its extreme and changing habitat. It  
290 also has traits related to resistance to heavy metals (mainly copper and mercury),  
291 antibiotics (mainly beta-lactams and vancomycin), arsenic, fluoride, and chlorite (Table  
292 S3, S4).

293 Both, the Prokka and RAST annotations account for several genes for  
294 resistance/tolerance to copper (Table 2). Among the direct mechanisms of resilience to  
295 copper described by Giachino and Waldron (2020) in Act20 is worth to mention the *cop*  
296 family, implicated in copper homeostasis through the capture and expulsion of Cu[I]  
297 ions from the cytosol to the periplasm. This mechanism may be complemented by the  
298 action of a copper oxidase necessary for converting Cu [I] to Cu [II], which is more  
299 biologically inert and tend to remain in the periplasm. It is also interesting the presence  
300 of a gene matching a recently discovered family of copper-binding proteins involved in  
301 cytosolic copper storage (Dennison et al., 2018). On the other hand, the indirect  
302 mechanisms would involve the participation of genes whose actions compensate for  
303 specific damage caused by toxic copper. This is the case for the specific DsbD oxidase  
304 which rearranges misfolded peptides, and the Fur master regulator of iron metabolism

305 that counteracts the constant scavenging of iron cofactors from enzymes, which in turn  
306 can generate ROS (Giachino and Waldron, 2020).

307           Previous assays carried out on Act20 revealed its ability to grow in alkaline  
308 media (up to pH 12) and at high NaCl (25%) and Na<sub>2</sub>CO<sub>3</sub> (5 mM) concentrations  
309 (Rasuk et al., 2017). In this work, we also verify its desiccation tolerance, a phenotype  
310 that is supported by a vast repertory of genes (Table 3). This ability may be explained  
311 by the presence of transporters for the uptake of a diverse organic osmoprotectant such  
312 as glycine betaine, proline betaine, glycerol, choline, and trehalose. Genes for the  
313 synthesis of glycine betaine and the complete set of genes for ectoine were also detected  
314 (Table 3, Fig. S3). These compounds counteract the environment's high osmolality  
315 avoiding a rapid efflux of water from the cell and, consequently, the loss of turgor. Low  
316 turgor starts a rapid influx/synthesis of these osmo-protectants that complement another  
317 inorganic compounds (Lucht and Bremer, 1994; Nagata and Wang, 2001; Styrvold and  
318 Strom, 1991; Wood, 1988). Other genes, like OsmC and MdoB, are involved in coping  
319 the osmotic stress in peculiar ways (Atichartpongkul et al., 2001), specifically MdoB,  
320 whose product requires periplasm and outer membrane facilitate its effect (Sleator and  
321 Hill, 2002), both structures not normally present in Gram-positive bacteria including  
322 Act20.

323           The genomic profile of ABC transporters and the two-component system is  
324 also a reflection of the original environment. The set of proteins to sense phosphate  
325 limitation and subsequent phosphorus incorporation (in the form of phosphates and  
326 phosphonates) are evident (Fig. S4, S5). A similar is noticed for osmotic stress. Other  
327 environmental sensing types include oxygen limitation, low temperature, cell envelope  
328 stress, cell wall stress, and antibiotics. Transporters for iron and various organic

329 compounds such as carbohydrates (mostly of plant origin), nucleosides, amino acids,  
330 and oligopeptides were also reported.

331 To discover unique functional traits of Act20, we searched the orthologous  
332 sequences for public available *Nesterenkonia* genomes. The set of annotated FASTA  
333 files belonging to genomes were processed through Proteinortho, which detect  
334 orthologous genes within different species. The proteins of Act20 that did not match  
335 any ortholog were analyzed one by one to verify if the annotated function they encode is  
336 unique for Act20 and is not present in other representatives of the genera. Table 4  
337 shows the exclusive traits of Act20, most of them related to its extreme natural  
338 environments such as bacterial persistence, bacterial cell envelope stress response, and  
339 resistance to osmotic stress, desiccation, and phosphate starvation. Degradative  
340 enzymes 6-deoxy-6-sulfogluconolactonase and  $\alpha$ -xylosidase take part in the  
341 decomposition of prototrophic biomass present in the soil, from which Act20 could take  
342 advantage. The remaining functions were characterized only at the protein domain level,  
343 like ethyl tert-butyl ether degradation, second messenger's sensors, and cell wall  
344 binding.

345 **3.5. UV-Resistome of Act20.** The high UV-resistance profile of Act20 calls for more  
346 in-depth characterization and points out the existence of integrated physiological and  
347 molecular mechanisms triggered by ultraviolet light exposure. We named this system  
348 "UV-resistome" as described before for other AME poly-extremophiles (Kurth et al.,  
349 2015; Portero et al., 2019). Ideally, the UV-resistome depends on expressing a diverse  
350 set of genes devoted to evading or repairing the damage provoked directly or indirectly.  
351 Ideally, it encompasses the following subsystems: (1) UV sensing and effective  
352 response regulators; (2) avoidance and shielding strategies; (3) damage tolerance and  
353 oxidative stress response; and (4) DNA damage repair. Therefore, we screened genes

354 associated with each of these UV-B resistome subsystems for all available genomes of  
355 the *Nesterenkonia* genus. This approach unveiled the relative genomic potential of  
356 Act20 to defend itself from UV-B radiation, a strain that naturally endures the highest  
357 irradiation on the planet. Unlike previous works, we studied the UV-resistance  
358 integrally and included genes that could have the potential to generate a UV evasion  
359 response or could lessen the negative impact the light, such as motility genes, pilus, and  
360 gas vesicles (Damerval et al., 1991).

361 Table S5 details the UV-resistome for every strain and clusters it by subsystems.  
362 The collections summarized all types of damage repair (base excision repair, nucleotide  
363 excision repair, mismatch repair, homologous repair, direct repair, homologous repair,  
364 direct repair, translesion DNA synthesis factors, and SOS response factors) explicitly,  
365 oxidative stress response and UV avoidance/protection mechanisms (synthesis of  
366 photoprotective pigments, and genes for flagellum, pilus, gas vesicles, and swarming  
367 motility; Fig. 2). The bars are sorted from top to bottom, taking into account the number  
368 of different genes for each subsystem. Act20 is positioned at the top with the most  
369 diverse and complete UV-resistome, with 114 genes, followed by NBAIMH1 with 107  
370 genes, which also belongs to an extreme altitude environment. Interestingly, other  
371 strains from harsh environments with expected high solar radiation, such as AN1 and  
372 M8 with 85 and 83 genes, respectively, also have robust UV-resistomes. On the other  
373 hand, strains belonging to environments with little or null exposure to solar radiation  
374 present less diverse and fewer genes: i.e., *N. alba*. DSM19423, GY074, and RB2 with  
375 56, 63, and 65 genes, respectively.

376 **3.5. Ultrastructural changes in UV-challenged Act20 cells.** The morphology and  
377 ultrastructure of the actinobacterium *Nesterenkonia* sp. Act20 was observed under UV  
378 challenging and non-challenging conditions to determine their behavior in their original



379 environment. *Nesterenkonia halotolerans* DSM 15474 (NH) was used for comparison.  
380 Under SEM, in normal conditions, Act20 and DSM 15474 cells appear as irregular  
381 coccoids or short rod-shaped. Their size varied between 0.41-0.43 x 0.6-0.82  $\mu\text{m}$  for  
382 Act20 and 0.41-0.38 x 0.71-0.51 for NH. The surface was smooth without evidence of  
383 cell wall rupture (Fig. 3A, 3E). In contrast, after exposure to UV both strains exhibited  
384 morphological alterations, which were consistently more severe in NH cells.

385           As the dose increases, Act20 morphology changed as individuals became  
386 longer and sometimes wide, probably due to cell division's interruption, causing a  
387 complete deformation in the cell (see black arrows in Fig. 3C, 3D). Furthermore, the  
388 cells' surface appeared with shrinkage signs (see white arrows in Fig. 3C). In NH,  
389 fibrillar structures were observed only on the surface of cells treated for 5 and 15 min  
390 with RUV (Fig. 3F, 3G). We found that at the dose of 0,51 Jls/cm<sup>2</sup> (15 min), the pili  
391 thickened, and in some sections, they broke or disintegrated (see Fig. 3G, white arrows).  
392 At 30 min of exposure (Fig. 3H), cell aggregates were observed in which bacterial cells  
393 adhered to one another by self-produced extracellular polymeric (EPS) substances. The  
394 surface irregularity was also found, indicating the wall cell rupture and degradation,  
395 probably causing cell lysis (Fig. 3H, black arrow).

396           TEM images for both strains were likewise obtained (Fig. 4). EM analysis  
397 revealed the typical Gram-positive bacteria structure, an intense electron opaque inner  
398 layer corresponding to the cytoplasmic membrane (CM) and a less electron opaque  
399 outer layer or cell wall (CW).

400           Ultrastructural changes were observed in the cells after exposure to UV  
401 radiation, especially at the structural membrane level, acquiring a certain degree of  
402 disorganization compared to the untreated strains (controls). A general observation in

403 both UV-treated bacteria was that numerous cells contained septa (S), compared to  
404 control samples. Radiation stress probably caused the cell division process to stop at  
405 this point without completing cell separation, whereas in control cells, the division was  
406 normal.

407 Furthermore, variations in the cell envelope thickness were frequently observed  
408 (see black arrows in Fig. 4). During the highest doses of UVR (15 and 30 min  
409 exposure), the different cytoplasmic structures were visualized by electron density  
410 variations. In Act20, polyphosphate-like granules (G) were visible, appearing as  
411 electron-dense aggregates, scattered throughout the cytoplasm but surrounding the  
412 nucleoid (N), with diameters varying between 0.2-0.3  $\mu\text{m}$  (Fig. 4C, 4D); as well as  
413 mesosome-like structures (m) formed from projections of the cytoplasmic membrane  
414 (Fig. 4D). Also, the interaction between neighboring cells could be observed (see white  
415 arrows in Fig. 4D). In NH, the damage caused by UV at the cytoplasmic membrane  
416 level was more pronounced. The heterogeneous and disorderly appearance (see grey  
417 arrows in Fig. 4G, 4H) could result from loss of membrane integrity, leading to a  
418 malfunction of the permeability barrier and inducing cell lysis. Mesosome-like  
419 structures (m) (Fig. 4G, 4H) are frequent, and the interaction between bacteria mediated  
420 for pili or EPS is a common feature too (see white arrows).

421 **3.5. Genome insights in Act20 biotechnological potential.** Act20 is a halophile with  
422 enormous biotechnological potential, as it encodes haloenzymes and proteins with  
423 current applications in the food industry, waste treatment, medicine, cosmetics,  
424 biocontrol, pharmacology, paper industry, bioremediation, fuel, and chemical industry  
425 (Table 5).

426 Act20 could degrade wasted vegetal biomass, especially lignocellulose  
427 derivatives, as it encodes  $\alpha$ -xylosidase, xylanases, xylose isomerases, and an  $\alpha$ -

428 arabinofuranosidase. Also has a chitinase, which confers the potential to degrade wasted  
429 animal biomass. The genome of Act20 also reports the possibility of producing some  
430 exciting compounds of interest; these include bacterial cellulose, a compound with an  
431 emerging number of applications such as nanoparticle science and regenerative  
432 medicine (Gullo et al., 2018); bacterial hemoglobin, which was previously showed to  
433 enhance bioproduction upon low oxygen conditions (Frey and Kallio, 2003), promising  
434 antibiotics like colicin and aurachin (Gérard et al., 2005; Gerhard Hofle et al., 1987;  
435 Mousa et al., 2016; Oettmeier et al., 1994), and the protein Cry26Aa with high  
436 insecticide properties (Wojciechowska et al., 1999). Another relevant enzyme provided  
437 by the Act20 genome is the  $\alpha$ -sialidase, which has been proven to be useful in  
438 synthesizing sialylated glycoproteins (Kim et al., 2011) highly suitable for  
439 pharmacology (Varki, 2008).

440

### 441 **3. DISCUSSION**

442 *Nesterenkonia* sp. Act20 is an actinobacterium isolated from an Andean soil  
443 in the Puna region, one of the most extreme environments on the planet, which even  
444 NASA has used to test microbes and equipment for spatial explorations (Cabrol et al.,  
445 2007; Cockell et al., 2019). Although the polyextremophilic nature of Act20 was  
446 preliminary explored before, its genome's functional characteristics have remained  
447 uncovered. In this work, we revealed the genomic basis of the multi-resistance  
448 phenotype of strain Act20, especially towards UV radiation, copper and desiccation. Its  
449 potential on the production of enzymes and compounds useful for biotechnology was  
450 likewise explored.

451 The 'extreme' environmental conditions suffered in its original environment  
452 –arid soil at 3,600 m- challenged Act20 to evolve mechanisms to tolerate a wide range

453 of chemical and physical stresses. They include strong fluctuations in daily temperature,  
454 hypersalinity, alkaline pH, high levels of UV radiation, a low nutrient availability,  
455 desiccation, and high concentrations of heavy metals and metalloids, especially arsenic  
456 (Albarracín et al., 2016, 2015; Dib et al., 2008, 2009; Farías et al., 2009; Fernández  
457 Zenoff et al., 2006; Ordoñez et al., 2009). *Nesterenkonia* strains were frequently  
458 isolated from environmental niches, including other saline locations (Amiri et al., 2016;  
459 Yoon et al., 2006). It was demonstrated that the ecology of these diverse habitats  
460 defines the genetic differentiation of *Nesterenkonia*. Such genetic differentiation seems  
461 to be a key feature in the genome of Act20 as it shares low sequence similarity with  
462 other strains of the set of genomes analyzed with ANI. The genomic and physiological  
463 particularities suggests Act20 may be a new species adapted to the HAAL environment;  
464 experiments heading this way are currently in progress in our lab (Fig. 1).

465           Act20's copper and desiccation resistance described before is coincident  
466 with several sequences found in its genome potentially involved in such resistance. It is  
467 noteworthy the abundance of direct and indirect mechanisms implicated in the copper  
468 resistance; some of them were well studied in Gram-negative bacteria and are  
469 performed by periplasmic proteins, which are unlike to exist in the Gram-positive Act20  
470 which lacks outer membrane and periplasm (Giachino and Waldron, 2020). Likewise,  
471 the desiccation resistance relies on the production of a wide diversity of  
472 osmoprotectants that creates a hydrostatic force in the cytoplasm; the puzzling fact is  
473 that MdoB protein would provoke such hydrostatic pressure only in the periplasm. In  
474 both cases, it will be interesting to assess whether Act20 cell wall structure can  
475 accommodate a periplasmic-like space where the described gene products can function  
476 as proposed for Gram-negative bacteria, periplasmic space was reported for other Gram-  
477 positive bacteria (Matias and Beveridge, 2005; Zuber et al., 2006).

478                   A particular cytosolic copper storage protein in the annotation analysis  
479 called our attention. Its function and existence are controversial since a widely accepted  
480 view is that bacteria have not evolved to use intracellular copper accumulation due to  
481 potential toxicity associated with their metalation (Dennison et al., 2018). Note that this  
482 protein was initially discovered in the Gram-negative methane-oxidizing bacterium  
483 (methanotroph) *Methylosinus trichosporium* OB3b, which use large amounts of copper  
484 to metabolize methane via the membrane-bound (particulate) methane monooxygenase  
485 (pMMO) (Vita et al., 2015). Nevertheless, it is not clear the role of this copper storage  
486 in Act20 which can otherwise work as an additional osmoprotectant. More research will  
487 be needed to confirm the copper bioaccumulation ability of Act20, a mechanism useful  
488 for the design of bioremediation processes and applicable to several pollutant activities  
489 such as industry and mining.

490                   The complete set of genes for ectoine synthetic cluster is present in Act20  
491 genome (Fig. S3), conferring the strain an excellent potential for future biotechnological  
492 applications. Ectoine is a water-binding zwitterionic amino acid derivative with  
493 numerous biotechnological applications. It is a common component of cosmetic anti-  
494 aging and moisturizing creams to improve skin resistance to surfactants in skin  
495 cleansing solutions. It also alleviates skin inflammation, being currently recommended  
496 to treat moderate atopic dermatitis (Bownik and Stępniewska, 2016). Furthermore, the  
497 compound is useful in sunscreens as it strongly absorbs ultraviolet (UV) radiation and  
498 protects DNA from breaking down in diverse cell types. Ectoine also has applications in  
499 medicine: it can inhibit HIV replication and stabilize retroviral vectors for gene therapy  
500 (Bownik and Stępniewska, 2016). The alleviation of certain kinds of inflammation  
501 (colitis and neutrophilic lung inflammation) and allergic rhinitis were also reported,

502 even preventing the amyloid formation and delaying the onset and progression of  
503 Alzheimer's disease (Bownik and Stępniewska, 2016).

504 Metabolism of arsenic, a toxic element that can limit or suppress bacterial  
505 growth, is also possible for Act20. It has previously been demonstrated that Act20 can  
506 tolerate arsenic in the form of As (V) (0-200 mM) (Rasuk et al., 2017). In this work, we  
507 reported the presence of an arsenate reductase (not specified), an arsenate-myocthiol  
508 transferase, an arsenic transporter (not specified), and seven regulators of the ArsR  
509 family (Table S3). We propose that this resistance probably occurs by reducing As (V)  
510 to As (III) with a myocthiol-dependent arsenate reductase and subsequent efflux of As  
511 (III) from the cell using specific transporters (Ordóñez et al., 2009). Thus, the genome  
512 of Act20 joins others already sequenced from HAAL extremophilic prokaryotes  
513 (Burguener et al., 2014; Farias et al., 2011; Ordoñez et al., 2015, 2013), being the first  
514 of the *Nesterenkonia* genus reported for an environment with a high concentration of  
515 arsenic, and the first HAAL genome reporting the reduction of As (V) to As (III)  
516 through the myocthiol/thioredoxin redox pathway.

517 The genome of Act20 also seems to be optimized to cope with low nutrient  
518 availability, particularly phosphorous, as genes for a phosphorous-specific two-  
519 component system and transporters are well represented (Fig. S4, S5). The two-  
520 component system detects low phosphorous availability and communicates the signal to  
521 the cell, which expresses phosphate and phosphonate active transporters. Also, two  
522 phosphate starvation inducible proteins were reported in the annotation, PhoH, and  
523 SphX (Table 4, Table S3), being the latter unique of Act20 and no present in other  
524 *Nesterenkonia*. The genomic data also reveals that Act20 could face carbon starvation  
525 as its genome codifies active transporters to uptake several kinds of peptides,  
526 nucleotides, amino acids, and carbohydrates from the environment (Table S3, Fig. S4).

527 *Nesterenkonia* sp. Act20 genome is the first one of this genus reported from  
528 the highest UV irradiation environment on Earth: Puna-High Andes region; in  
529 accordance, we found genetic traces for complex UV resistance mechanisms  
530 comprehensively called as UV-resistome. The comparison of UV-genomic determinants  
531 of Act20 with other *Nesterenkonia* genomes indicated indeed a more sophisticated UV-  
532 resistome for the Socompa strain. It is then evident that environmental irradiation has a  
533 notable impact on the genome of Act20, which has a higher quantity and diversity of  
534 genes dedicated to UV resistance than other strains less irradiated. We also observed a  
535 similar pattern for other *Nesterenkonia* from high altitude or expected high irradiated  
536 environments (Fig. 2, Table S7). Interestingly, solar irradiation intensity selecting UV-  
537 resistome gene abundance and diversity in aquatic microbiomes was also evidenced by  
538 our group using a worldwide metagenomic analysis (Alonso-Reyes et al., 2020).

539 Among the subsystem of UV evasion/shielding is worth to note the genes  
540 involved in the production of gas vesicles (gvpA, K, O and F). Certainly, the expression  
541 of gas vesicles (Damerval et al., 1991; Englert et al., 1992; Pfeifer, 2012) along with  
542 flagella, allow microbes to move up in the water column toward sunlight. However, in  
543 many cases, these vesicles are also present in soil prokaryotes, even from high UV  
544 radiation environments, thus suggesting new roles in radiation protection (Oren, 2012).  
545 It has been speculated that they could change the cell position concerning the angle of  
546 the light's incidence, changing its impact on the cell (Bolhuis et al., 2006; Oren, 2012).  
547 Additionally, our current works on comparative proteomics reveal an increase in vesicle  
548 proteins' expression in response to the UV increase (Zannier et al., in preparation). We  
549 also include flagella, swarming motility proteins and the pili, whose ability to promote  
550 bacterial aggregation or biofilm adhesion may protect the cells from the UV exposure  
551 (Burdman et al., 2011; Ojanen-Reuhs et al., 1997).

552 Act20 genome codes resistance genes to other extreme factors: low  
553 temperatures, low atmospheric O<sub>2</sub> pressure, heavy metal and other toxic compounds  
554 stress. Many of these hard environmental factors added to the previously mentioned and  
555 geophysical characteristics of the sampling site resembles those present in Early's Earth  
556 atmosphere that witnessed the evolution of ancient microorganisms (Albarracín et al.,  
557 2015; Cabrol et al., 2007) (Fig. 5) (Cockell et al., 2000; Forni et al., 2015; Hecht et al.,  
558 2009; Karunatilake et al., 2007; Sforza et al., 2014; Wadsworth and Cockell, 2017;  
559 Yen et al., 2006) (<https://mars.nasa.gov/all-about-mars/facts/>). Thus, Act20 is an  
560 exciting model to study the mechanisms by which the extremophiles could have  
561 successfully faced the adverse conditions of the Earth's history, having clear  
562 implications on astrobiological projects (Hiscox and Thomas, 1995; Merino et al., 2019;  
563 Slotnick, 2000).

564 Act20 could also have a great biotechnological potential for producing and  
565 metabolizing compounds and enzymes of interest (Table 5). Bacterial cellulose,  
566 hemoglobin, antibiotics, and a potential insecticide are among the Act20 biosynthetic  
567 products. On the other hand, several genes for enzymes capable of degrade vegetal  
568 biomass were also detected. This feature is of importance for the biodegradation of  
569 lignocellulosic biomass of agro-industrial wastes which are produced in large amounts  
570 through agricultural and forestry practices, including the paper-and-pulp and timber  
571 industries. On the other hand, animal biomass that contains high proportions of  
572 shellfish, such as shrimp, crab, and krill, are suitable to be processed through chitinases,  
573 an enzyme that is also present in Act20. The seafood processing industry has raised  
574 serious concerns regarding disposal issues because of this waste's low biodegradation  
575 rate, which could be solved through an enzymatic approach.



576           The enzymes mentioned above could be used in industrial processes that  
577 reproduce the microbe's original natural habitat's extreme conditions. Biocatalysts  
578 isolated by these extremophiles are termed extremozymes and possess special salt  
579 allowance, thermostability, and cold adaptivity. Extremozymes are very resistant to  
580 severe conditions owing to their great versatility. As such, they represent new prospects  
581 for biocatalysis and biotransformations and the development of the economy and unique  
582 line of research through their application (Dumorné et al., 2017). Here, we also report  
583 the genetic potential of Act20 to provide poly-extremozymes, which could combine  
584 resistance to cold ( $-2^{\circ}\text{C}$  -  $20^{\circ}\text{C}$ ), high solar radiation, salinity (at least 1 M salt), and  
585 high pH ( $>8$ ). Enzymes of this halophilic microbe could provide great opportunities,  
586 particularly for food, bioremediation, and pharmacy industries.

587

## 588 **CONCLUSION**

589           In this work, we have confirmed by lab assays the multi-resistance  
590 phenotype of *Nesterenkonia* sp. Act20, a poly-extremophile originally isolated from  
591 Puna arid soil surrounding Lake Socompa, in the Puna region, exposed to the highest  
592 irradiated environment on Earth. Accordingly, its genome codes for a plethora of genes  
593 that help counteract the ecological pressure of the hostile conditions face by the microbe  
594 in its original environment: i.e. arsenic, nutrient limiting conditions, osmotic stress, UV  
595 radiation, low temperatures, low atmospheric O<sub>2</sub> pressure, heavy metal and other toxic  
596 elements stress.

597           As a novel extremophile, Act20 has the potential to produce compounds  
598 (extremolytes and extremoenzymes) of interest with application in industrial processes  
599 such as an insecticidal protein, bacterial cellulose, ectoine, colicin V, araucins,

600 chitinases and cellulases. In this way, Act20 becomes an exciting candidate for  
601 additional studies of transcriptomics, proteomics (currently in progress), metabolomics,  
602 as well as the expression and testing of biotech-competent enzymes. The herein report  
603 shed light on the microbial adaptation to high-altitude environments, its possible  
604 extrapolation for studying other extreme environments of relevance, and its application  
605 to industrial and biotechnological processes.

606

#### 607 **4. ACKNOWLEDGEMENTS**

608 The authors acknowledge the generous financial support by PIUNT G603  
609 and PIP CONICET 0519 projects. VHA, MPV, and MEF are staff researchers from the  
610 National Research Council (CONICET) in Argentina. DA, MSG, NNA are the  
611 recipients of doctoral fellowships from CONICET. Act20 genome sequencing project  
612 was performed in INDEAR-CONICET, Argentina. Electron micrographs used in this  
613 study were taken at the Center for Electron Microscopy (CIME) belonging to UNT and  
614 CCT, CONICET, Tucuman. This manuscript has been released as a Pre-Print at  
615 bioRxiv.

616

#### 617 **REFERENCES**

- 618 Albarracín, V., Simon, J., Pathak, G., ... L.V.-P.&, 2014, U., 2014. First  
619 characterisation of a CPD-class I photolyase from a UV-resistant extremophile  
620 isolated from High-Altitude Andean Lakes. [pubs.rsc.org](https://pubs.rsc.org).
- 621 Albarracín, V.H., Amoroso, M.J., Abate, C.M., 2005. Isolation and characterization of  
622 indigenous copper-resistant actinomycete strains. *Geochemistry* 65, 145–156.  
623 <https://doi.org/https://doi.org/10.1016/j.chemer.2005.06.004>

- 624 Albarracín, V.H., Gärtner, W., Farias, M.E., 2016. Forged Under the Sun: Life and Art  
625 of Extremophiles from Andean Lakes. *Photochem. Photobiol.* 92, 14–28.  
626 <https://doi.org/10.1111/php.12555>
- 627 Albarracín, V.H., Kurth, D., Ordoñez, O.F., Belfiore, C., Luccini, E., Salum, G.M.,  
628 Piacentini, R.D., Farías, M.E., 2015. High-Up: A Remote Reservoir of Microbial  
629 Extremophiles in Central Andean Wetlands. *Front. Microbiol.* 6, 1404.  
630 <https://doi.org/10.3389/fmicb.2015.01404>
- 631 Albarracín, V.H., Winik, B., Kothe, E., Amoroso, M.J., Abate, C.M., 2008. Copper  
632 bioaccumulation by the actinobacterium *Amycolatopsis* sp. AB0. *J. Basic*  
633 *Microbiol.* 48, 323–330. [https://doi.org/https://doi.org/10.1002/jobm.200700360](https://doi.org/10.1002/jobm.200700360)
- 634 Albarracín, V.H., Farías, M.E., 2012. Biotecnología Turquesa. *Rev. Hipótesis* 13, 32–39.
- 635 Amiri, H., Azarbaijani, R., Parsa Yeganeh, L., Shahzadeh Fazeli, A., Tabatabaei, M.,  
636 Hosseini Salekdeh, G., Karimi, K., 2016. *Nesterenkonia* sp. strain F, a halophilic  
637 bacterium producing acetone, butanol and ethanol under aerobic conditions. *Sci.*  
638 *Rep.* 6, 18408. <https://doi.org/10.1038/srep18408>
- 639 Bequer Urbano, S., Albarracín, V.H., Ordoñez, O.F., Farías, M.E., Alvarez, H.M., 2013.  
640 Lipid storage in high-altitude Andean Lakes extremophiles and its mobilization  
641 under stress conditions in *Rhodococcus* sp. A5, a UV-resistant actinobacterium.  
642 *Extremophiles* 17, 217–227. <https://doi.org/10.1007/s00792-012-0508-2>
- 643 Bolhuis, H., Palm, P., Wende, A., Falb, M., Rampp, M., Rodriguez-Valera, F., Pfeiffer,  
644 F., Oesterhelt, D., 2006. The genome of the square archaeon *Haloquadratum*  
645 *walsbyi*: life at the limits of water activity. *BMC Genomics* 7, 169.  
646 <https://doi.org/10.1186/1471-2164-7-169>
- 647 Bownik, A., Stępniewska, Z., 2016. Ectoine as a promising protective agent in humans  
648 and animals. *Arh. Hig. Rada Toksikol.* 67, 260–265. <https://doi.org/10.1515/aiht->

- 649 2016-67-2837
- 650 Bozzola, J.J., 2007. Conventional specimen preparation techniques for scanning  
651 electron microscopy of biological specimens. *Methods Mol. Biol.* 369, 449–466.  
652 [https://doi.org/10.1007/978-1-59745-294-6\\_22](https://doi.org/10.1007/978-1-59745-294-6_22)
- 653 Burdman, S., Bahar, O., Parker, J.K., de la Fuente, L., 2011. Involvement of type IV pili  
654 in pathogenicity of plant pathogenic bacteria. *Genes (Basel)*. 2, 706–735.  
655 <https://doi.org/10.3390/genes2040706>
- 656 Burguener, G.F., Maldonado, M.J., Revale, S., Fernández Do Porto, D., Rascován, N.,  
657 Vázquez, M., Farías, M.E., Marti, M.A., Turjanski, A.G., 2014. Draft Genome  
658 Sequence of the Polyextremophilic Halorubrum sp. Strain AJ67, Isolated from  
659 Hyperarsenic Lakes in the Argentinian Puna. *Genome Announc.* 2, e01096-13.  
660 <https://doi.org/10.1128/genomeA.01096-13>
- 661 Cabrol, N.A., McKay, C.P., Grin, E.A., Kiss, K.T., Ács, E., Tóth, B., Grigorszky, I.,  
662 Szabo, K., Fike, D.A., Hock, A.N., Demergasso, C., Escudero, L., Galleguillos, P.,  
663 Chong, G., Grigsby, B.H., Román, J.Z., Tambley, C., 2007. Signatures of habitats  
664 and life in Earth's high-altitude lakes: clues to Noachian aqueous environments on  
665 Mars, in: *The Geology of Mars Evidence from Earth-Based Analogs*. pp. 349–370.
- 666 Cockell, C.S., Catling, D.C., Davis, W.L., Snook, K., Kepner, R.L., Lee, P., McKay,  
667 C.P., 2000. The Ultraviolet Environment of Mars: Biological Implications Past,  
668 Present, and Future. *Icarus* 146, 343–359.  
669 <https://doi.org/https://doi.org/10.1006/icar.2000.6393>
- 670 Cockell, C.S., Harrison, J.P., Stevens, A.H., Payler, S.J., Hughes, S.S., Kobs  
671 Nawotniak, S.E., Brady, A.L., Elphic, R.C., Haberle, C.W., Sehlke, A., Beaton,  
672 K.H., Abercromby, A.F.J., Schwendner, P., Wadsworth, J., Landenmark, H., Cane,  
673 R., Dickinson, A.W., Nicholson, N., Perera, L., Lim, D.S.S., 2019. A Low-

- 674 Diversity Microbiota Inhabits Extreme Terrestrial Basaltic Terrains and Their  
675 Fumaroles: Implications for the Exploration of Mars. *Astrobiology* 19, 284–299.  
676 <https://doi.org/10.1089/ast.2018.1870>
- 677 Damerval, T., Castets, A.-M., Houmard, J., de Marsac, N.T., 1991. Gas vesicle  
678 synthesis in the cyanobacterium *Pseudanabaena* sp.: occurrence of a single  
679 photoregulated gene. *Mol. Microbiol.* 5, 657–664. [https://doi.org/10.1111/j.1365-](https://doi.org/10.1111/j.1365-2958.1991.tb00737.x)  
680 [2958.1991.tb00737.x](https://doi.org/10.1111/j.1365-2958.1991.tb00737.x)
- 681 Dennison, C., David, S., Lee, J., 2018. Bacterial copper storage proteins. *J. Biol. Chem.*  
682 293, 4616–4627. <https://doi.org/10.1074/jbc.TM117.000180>
- 683 Dib, J., Motok, J., Zenoff, V.F., Ordoñez, O., Farías, M.E., 2008. Occurrence of  
684 Resistance to Antibiotics, UV-B, and Arsenic in Bacteria Isolated from Extreme  
685 Environments in High-Altitude (Above 4400 m) Andean Wetlands. *Curr.*  
686 *Microbiol.* 56, 510–517. <https://doi.org/10.1007/s00284-008-9103-2>
- 687 Dib, J.R., Wagenknecht, M., Hill, R.T., Farías, M.E., Meinhardt, F., 2010. Novel linear  
688 megaplasmid from *Brevibacterium* sp. isolated from extreme environment. *J. Basic*  
689 *Microbiol.* 50, 280–284. <https://doi.org/10.1002/jobm.200900332>
- 690 Dib, J.R., Weiss, A., Neumann, A., Ordoñez, O., Estévez, M.C., Farías, E., 2009.  
691 Isolation of Bacteria from Remote High Altitude Andean Lakes Able to Grow in  
692 the Presence of Antibiotics \*. *Recent Pat. Antiinfect. Drug Discov.* 1–11.
- 693 Dumorné, K., Córdova, D.C., Astorga-Eló, M., Renganathan, P., 2017. Extremozymes:  
694 A potential source for industrial applications. *J. Microbiol. Biotechnol.* 27, 649–  
695 659. <https://doi.org/10.4014/jmb.1611.11006>
- 696 Englert, C., Krüger, K., Offner, S., Pfeifer, F., 1992. Three different but related gene  
697 clusters encoding gas vesicles in halophilic archaea. *J. Mol. Biol.* 227, 586–592.  
698 [https://doi.org/https://doi.org/10.1016/0022-2836\(92\)90914-6](https://doi.org/https://doi.org/10.1016/0022-2836(92)90914-6)

- 699 Farías, M.E., Fernández-Zenoff, V., Flores, R., Ordóñez, O., Estévez, C., 2009. Impact  
700 of solar radiation on bacterioplankton in Laguna Vilama, a hypersaline Andean  
701 lake (4650 m). *J. Geophys. Res. Biogeosciences* 114.  
702 <https://doi.org/10.1029/2008JG000784>
- 703 Farias, M.E., Revale, S., Mancini, E., Ordoñez, O., Turjanski, A., Cortez, N., Vazquez,  
704 M.P., 2011. Genome sequence of *Sphingomonas* sp. S17 isolated from an alkaline,  
705 hyperarsenic and hypersaline volcanic associated lake near 4000 meters above sea  
706 level in the Argentinean Puna. *J. Bacteriol.* JB.05225-11.  
707 <https://doi.org/10.1128/JB.05225-11>
- 708 Fernández Zenoff, V., Siñeriz, F., Farías, M.E., 2006. Diverse responses to UV-B  
709 radiation and repair mechanisms of bacteria isolated from high-altitude aquatic  
710 environments. *Appl. Environ. Microbiol.* 72, 7857–7863.  
711 <https://doi.org/10.1128/AEM.01333-06>
- 712 Forni, O., Gaft, M., Toplis, M.J., Clegg, S.M., Maurice, S., Wiens, R.C., Mangold, N.,  
713 Gasnault, O., Sautter, V., Le Mouélic, S., Meslin, P.-Y., Nachon, M., McInroy,  
714 R.E., Ollila, A.M., Cousin, A., Bridges, J.C., Lanza, N.L., Dyar, M.D., 2015. First  
715 detection of fluorine on Mars: Implications for Gale Crater’s geochemistry.  
716 *Geophys. Res. Lett.* 42, 1020–1028. <https://doi.org/10.1002/2014GL062742>
- 717 Frey, A.D., Kallio, P.T., 2003. Bacterial hemoglobins and flavohemoglobins: versatile  
718 proteins and their impact on microbiology and biotechnology. *FEMS Microbiol.*  
719 *Rev.* 27, 525–545. [https://doi.org/10.1016/S0168-6445\(03\)00056-1](https://doi.org/10.1016/S0168-6445(03)00056-1)
- 720 Fu, X.-Z., Tan, D., Aibaidula, G., Wu, Q., Chen, J.-C., Chen, G.-Q., 2014. Development  
721 of *Halomonas* TD01 as a host for open production of chemicals. *Metab. Eng.* 23,  
722 78–91. <https://doi.org/https://doi.org/10.1016/j.ymben.2014.02.006>
- 723 Gérard, F., Pradel, N., Wu, L.-F., 2005. Bactericidal Activity of Colicin V Is Mediated

- 724 by an Inner Membrane Protein, SdaC, of Escherichia coli. *J. Bacteriol.* 187, 1945  
725 LP – 1950. <https://doi.org/10.1128/JB.187.6.1945-1950.2005>
- 726 Gerhard Hofle, B.K., Reichenbach, H., Hofle, G., 1987. The Aurachins, New Quinoline  
727 Antibiotics from Myxobacteria: Production, Physico-Chemical and Biological  
728 Properties. *J. Antibiot. (Tokyo)*. 40, 258–265.  
729 <https://doi.org/10.7164/antibiotics.40.258>
- 730 Giachino, A., Waldron, K.J., 2020. Copper tolerance in bacteria requires the activation  
731 of multiple accessory pathways. *Mol. Microbiol.* 114, 377–390.  
732 <https://doi.org/10.1111/mmi.14522>
- 733 Gullo, M., La China, S., Falcone, P.M., Giudici, P., 2018. Biotechnological production  
734 of cellulose by acetic acid bacteria: current state and perspectives. *Appl. Microbiol.*  
735 *Biotechnol.* 102, 6885–6898. <https://doi.org/10.1007/s00253-018-9164-5>
- 736 Hecht, M.H., Kounaves, S.P., Quinn, R.C., West, S.J., Young, S.M.M., Ming, D.W.,  
737 Catling, D.C., Clark, B.C., Boynton, W. V, Hoffman, J., DeFlores, L.P.,  
738 Gospodinova, K., Kapit, J., Smith, P.H., 2009. Detection of Perchlorate and the  
739 Soluble Chemistry of Martian Soil at the Phoenix Lander Site. *Science* (80-. ). 325,  
740 64 LP – 67. <https://doi.org/10.1126/science.1172466>
- 741 Hiscox, J., Thomas, D., 1995. Genetic modification and selection of microorganisms for  
742 growth on Mars. *J. Br. Interplanet. Soc.* 48, 419–426.
- 743 Karunatillake, S., Keller, J.M., Squyres, S.W., Boynton, W. V, Brückner, J., Janes,  
744 D.M., Gasnault, O., Newsom, H.E., 2007. Chemical compositions at Mars landing  
745 sites subject to Mars Odyssey Gamma Ray Spectrometer constraints. *J. Geophys.*  
746 *Res. Planets* 112. <https://doi.org/10.1029/2006JE002859>
- 747 Kim, S., Oh, D.B., Kang, H.A., Kwon, O., 2011. Features and applications of bacterial  
748 sialidases. *Appl. Microbiol. Biotechnol.* 91, 1–15. <https://doi.org/10.1007/s00253->

749 011-3307-2

750 Kiran, G.S., Priyadharsini, S., Sajayan, A., Priyadharsini, G.B., Poulouse, N., Selvin, J.,  
751 2017. Production of Lipopeptide Biosurfactant by a Marine Nesterenkonia sp. and  
752 Its Application in Food Industry . Front. Microbiol. .

753 Kolde, R., 2019. R Package ‘pheatmap.’

754 Kurtböke, D.I., 2003. Selective Isolation of Rare Actinomycetes. Queensland Complete  
755 Printing Services, Nambour, Queensland.

756 Kurth, D., Belfiore, C., Gorriti, M.F., Cortez, N., Farias, M.E., Albarracín, V.H., 2015.  
757 Genomic and proteomic evidences unravel the UV-resistome of the poly-  
758 extremophile Acinetobacter sp. Ver3. Front. Microbiol. 6, 1–18.  
759 <https://doi.org/10.3389/fmicb.2015.00328>

760 Kurtz, S., Phillippy, A., Delcher, A.L., Smoot, M., Shumway, M., Antonescu, C.,  
761 Salzberg, S.L., 2004. Versatile and open software for comparing large genomes.  
762 Genome Biol. 5, R12. <https://doi.org/10.1186/gb-2004-5-2-r12>

763 Lechner, M., Findeiß, S., Steiner, L., Marz, M., Stadler, P.F., Prohaska, S.J., 2011.  
764 Proteinortho: Detection of (Co-)orthologs in large-scale analysis. BMC  
765 Bioinformatics 12, 124. <https://doi.org/10.1186/1471-2105-12-124>

766 Letunic, I., Bork, P., 2016. Interactive tree of life (iTOL) v3: an online tool for the  
767 display and annotation of phylogenetic and other trees. Nucleic Acids Res. 44,  
768 W242–W245. <https://doi.org/10.1093/nar/gkw290>

769 Liu, C., Baffoe, D.K., Zhan, Y., Zhang, M., Li, Y., Zhang, G., 2019. Halophile, an  
770 essential platform for bioproduction. J. Microbiol. Methods 166, 1–8.  
771 <https://doi.org/10.1016/j.mimet.2019.105704>

772 Lucht, J.M., Bremer, E., 1994. Adaptation of Escherichia coli to high osmolarity  
773 environments: Osmoregulation of the high-affinity glycine betaine transport



- 774 system ProU. FEMS Microbiol. Rev. 14, 3–20. <https://doi.org/10.1111/j.1574->  
775 [6976.1994.tb00067.x](https://doi.org/10.1111/j.1574-6976.1994.tb00067.x)
- 776 Matias, V.R.F., Beveridge, T.J., 2005. Cryo-electron microscopy reveals native  
777 polymeric cell wall structure in *Bacillus subtilis* 168 and the existence of a  
778 periplasmic space. Mol. Microbiol. 56, 240–251.  
779 [https://doi.org/https://doi.org/10.1111/j.1365-2958.2005.04535.x](https://doi.org/10.1111/j.1365-2958.2005.04535.x)
- 780 Merino, N., Aronson, H.S., Bojanova, D.P., Feyhl-Buska, J., Wong, M.L., Zhang, S.,  
781 Giovannelli, D., 2019. Living at the Extremes: Extremophiles and the Limits of  
782 Life in a Planetary Context. Front. Microbiol. 10, 780.  
783 <https://doi.org/10.3389/fmicb.2019.00780>
- 784 Montalvo, N.F., Mohamed, N.M., Enticknap, J.J., Hill, R.T., 2005. Novel actinobacteria  
785 from marine sponges. Antonie Van Leeuwenhoek 87, 29–36.  
786 <https://doi.org/10.1007/s10482-004-6536-x>
- 787 Mousa, W.K., Shearer, C., Limay-Rios, V., Ettinger, C.L., Eisen, J.A., Raizada, M.N.,  
788 2016. Root-hair endophyte stacking in finger millet creates a physicochemical  
789 barrier to trap the fungal pathogen *Fusarium graminearum*. Nat. Microbiol. 1,  
790 16167. <https://doi.org/10.1038/nmicrobiol.2016.167>
- 791 Nachtigall, J., Kulik, A., Helaly, S., Bull, A.T., Goodfellow, M., Asenjo, J.A., Maier,  
792 A., Wiese, J., Imhoff, J.F., Süßmuth, R.D., Fiedler, H.-P., 2011. Atacamycins A–  
793 C, 22-membered antitumor macrolactones produced by *Streptomyces* sp. C38. J.  
794 Antibiot. (Tokyo). 64, 775–780. <https://doi.org/10.1038/ja.2011.96>
- 795 Nagata, S., Wang, Y.B., 2001. Accumulation of ectoine in the halotolerant  
796 *Brevibacterium* sp. JCM 6894. J. Biosci. Bioeng. 91, 288–293.  
797 [https://doi.org/https://doi.org/10.1016/S1389-1723\(01\)80136-5](https://doi.org/10.1016/S1389-1723(01)80136-5)
- 798 Oettmeier, W., Masson, K., Soll, M., Reil, E., 1994. Acridones and quinolones as

- 799 inhibitors of ubiquinone functions in the mitochondrial respiratory chain. *Biochem.*  
800 *Soc. Trans.* 22, 213–216. <https://doi.org/10.1042/bst0220213>
- 801 Ojanen-Reuhs, T., Kalkkinen, N., Westerlund-Wikström, B., Van Doorn, J., Haahtela,  
802 K., Nurmiäho-Lassila, E.L., Wengelnik, K., Bonas, U., Korhonen, T.K., 1997.  
803 Characterization of the *fimA* gene encoding bundle-forming fimbriae of the plant  
804 pathogen *Xanthomonas campestris* pv. *vesicatoria*. *J. Bacteriol.* 179, 1280–1290.  
805 <https://doi.org/10.1128/jb.179.4.1280-1290.1997>
- 806 Ordóñez, E., Van Belle, K., Roos, G., De Galan, S., Letek, M., Gil, J.A., Wyns, L.,  
807 Mateos, L.M., Messens, J., 2009. Arsenate reductase, mycothiol, and mycoredoxin  
808 concert thiol/disulfide exchange. *J. Biol. Chem.* 284, 15107–15116.  
809 <https://doi.org/10.1074/jbc.M900877200>
- 810 Ordoñez, O., Lanzarotti, E., Kurth, D., Cortez, N., Farias, M., Turjanski, A., 2015.  
811 Genome comparison of two *Exiguobacterium* strains from high altitude andean  
812 lakes with different arsenic resistance: identification and 3D modeling of the Acr3  
813 efflux pump . *Front. Environ. Sci.* .
- 814 Ordoñez, O.F., Flores, M.R., Dib, J.R., Paz, A., Farías, M.E., 2009. Extremophile  
815 Culture Collection from Andean Lakes: Extreme Pristine Environments that Host a  
816 Wide Diversity of Microorganisms with Tolerance to UV Radiation. *Microb. Ecol.*  
817 58, 461–473. <https://doi.org/10.1007/s00248-009-9527-7>
- 818 Ordoñez, O.F., Lanzarotti, E., Kurth, D., Gorriti, M.F., Revale, S., Cortez, N., Vazquez,  
819 M.P., Farías, M.E., Turjanski, A.G., 2013. Draft Genome Sequence of the  
820 Polyextremophilic *Exiguobacterium* sp. Strain S17, Isolated from Hyperarsenic  
821 Lakes in the Argentinian Puna. *Genome Announc.* 1, e00480-13.  
822 <https://doi.org/10.1128/genomeA.00480-13>
- 823 Oren, A., 2012. The function of gas vesicles in halophilic archaea and bacteria: Theories

- 824 and experimental evidence. *Life* 3, 1–20. <https://doi.org/10.3390/life3010001>
- 825 Pfeifer, F., 2012. Distribution, formation and regulation of gas vesicles. *Nat. Rev.*  
826 *Microbiol.* 10, 705–715. <https://doi.org/10.1038/nrmicro2834>
- 827 Portero, L.R., Alonso-Reyes, D.G., Zannier, F., Vazquez, M.P., Farías, M.E., Gärtner,  
828 W., Albarracín, V.H., 2019. Photolyases and Cryptochromes in UV-resistant  
829 Bacteria from High-altitude Andean Lakes. *Photochem. Photobiol.* 95, 315–330.  
830 <https://doi.org/10.1111/php.13061>
- 831 Prabhakar, Y., Gupta, A., Kaushik, A., 2019. Enhanced decolorization of reactive violet  
832 dye 1 by halo-alkaliphilic *Nesterenkonia* strain: Process optimization, short  
833 acclimatization and reusability analysis in batch cycles. *Process Saf. Environ. Prot.*  
834 131, 116–126. <https://doi.org/https://doi.org/10.1016/j.psep.2019.09.004>
- 835 Price, M.N., Dehal, P.S., Arkin, A.P., 2010. FastTree 2 – Approximately Maximum-  
836 Likelihood Trees for Large Alignments. *PLoS One* 5, e9490.
- 837 Pruesse, E., Peplies, J., Glöckner, F.O., 2012. SINA: Accurate high-throughput multiple  
838 sequence alignment of ribosomal RNA genes. *Bioinformatics* 28, 1823–1829.  
839 <https://doi.org/10.1093/bioinformatics/bts252>
- 840 Rasuk, M.C., Ferrer, G.M., Kurth, D., Portero, L.R., Farías, M.E., Albarracín, V.H.,  
841 2017. UV-Resistant Actinobacteria from High-Altitude Andean Lakes: Isolation,  
842 Characterization and Antagonistic Activities. *Photochem. Photobiol.* 93, 865–880.  
843 <https://doi.org/10.1111/php.12759>
- 844 Richter, M., Rosselló-Móra, R., 2009. Shifting the genomic gold standard for the  
845 prokaryotic species definition. *Proc. Natl. Acad. Sci. U. S. A.* 106, 19126–31.  
846 <https://doi.org/10.1073/pnas.0906412106>
- 847 Schrempf, H., 2013. Actinobacteria within soils: capacities for mutualism, symbiosis  
848 and pathogenesis. *FEMS Microbiol. Lett.* 342, 77–78.

- 849 <https://doi.org/10.1111/1574-6968.12147>
- 850 Schulz, D., Beese, P., Ohlendorf, B., Erhard, A., Zinecker, H., Dorador, C., Imhoff, J.F.,  
851 2011. Abenquines A–D: aminoquinone derivatives produced by *Streptomyces* sp.  
852 strain DB634. *J. Antibiot. (Tokyo)*. 64, 763–768.  
853 <https://doi.org/10.1038/ja.2011.87>
- 854 Seemann, T., 2014. Prokka: rapid prokaryotic genome annotation. *Bioinformatics* 30,  
855 2068–2069. <https://doi.org/10.1093/bioinformatics/btu153>
- 856 Sforna, M.C., Philippot, P., Somogyi, A., van Zuilen, M.A., Medjoubi, K., Schoepp-  
857 Cothenet, B., Nitschke, W., Visscher, P.T., 2014. Evidence for arsenic metabolism  
858 and cycling by microorganisms 2.7 billion years ago. *Nat. Geosci.* 7, 811–815.  
859 <https://doi.org/10.1038/ngeo2276>
- 860 Sleator, R.D., Hill, C., 2002. Bacterial osmoadaptation: the role of osmolytes in  
861 bacterial stress and virulence. *FEMS Microbiol. Rev.* 26, 49–71.  
862 <https://doi.org/10.1111/j.1574-6976.2002.tb00598.x>
- 863 Slotnick, R.S., 2000. EXTREMOPHILIC TERRAFORMING. *Am. Sci.* 88, 124.
- 864 Solon, A.J., Vimercati, L., Darcy, J.L., Arán, P., Porazinska, D., Dorador, C., Farías,  
865 M.E., Schmidt, S.K., 2018. Microbial Communities of High-Elevation Fumaroles,  
866 Penitentes, and Dry Tephra “Soils” of the Puna de Atacama Volcanic Zone.  
867 *Microb. Ecol.* 76, 340–351. <https://doi.org/10.1007/s00248-017-1129-1>
- 868 Stackebrandt, E., Koch, C., Gvozdiak, O., Schumann, P., 1995. Taxonomic dissection  
869 of the genus *Micrococcus*: *Kocuria* gen. nov., *Nesterenkonia* gen. nov.,  
870 *Kytococcus* gen. nov., *Dermacoccus* gen. nov., and *Micrococcus cohn* 1872 gen.  
871 emend. *Int. J. Syst. Bacteriol.* 45, 682–692. [https://doi.org/10.1099/00207713-45-](https://doi.org/10.1099/00207713-45-4-682)  
872 4-682
- 873 Styrvold, O.B., Strom, A.R., 1991. Synthesis, accumulation, and excretion of trehalose

- 874 in osmotically stressed *Escherichia coli* K-12 strains: Influence of amber  
875 suppressors and function of the periplasmic trehalase. *J. Bacteriol.* 173, 1187–  
876 1192. <https://doi.org/10.1128/jb.173.3.1187-1192.1991>
- 877 Varki, A., 2008. Sialic acids in human health and disease. *Trends Mol. Med.* 14, 351–  
878 360. <https://doi.org/10.1016/j.molmed.2008.06.002>
- 879 Ventura, M., Canchaya, C., Tauch, A., Chandra, G., Fitzgerald, G.F., Chater, K.F., van  
880 Sinderen, D., 2007. Genomics of Actinobacteria: tracing the evolutionary history  
881 of an ancient phylum. *Microbiol. Mol. Biol. Rev.* 71, 495–548.  
882 <https://doi.org/10.1128/MMBR.00005-07>
- 883 Vita, N., Platsaki, S., Baslé, A., Allen, S.J., Paterson, N.G., Crombie, A.T., Murrell,  
884 J.C., Waldron, K.J., Dennison, C., 2015. A four-helix bundle stores copper for  
885 methane oxidation. *Nature* 525, 140–143. <https://doi.org/10.1038/nature14854>
- 886 Wadsworth, J., Cockell, C.S., 2017. Perchlorates on Mars enhance the bacteriocidal  
887 effects of UV light. *Sci. Rep.* 7, 4662. <https://doi.org/10.1038/s41598-017-04910-3>
- 888 Wichner, D., Idris, H., Houssen, W.E., McEwan, A.R., Bull, A.T., Asenjo, J.A.,  
889 Goodfellow, M., Jaspars, M., Ebel, R., Rateb, M.E., 2017. Isolation and anti-HIV-1  
890 integrase activity of lentzeosides A–F from extremotolerant *lentzea* sp. H45, a  
891 strain isolated from a high-altitude Atacama Desert soil. *J. Antibiot. (Tokyo)*. 70,  
892 448–453. <https://doi.org/10.1038/ja.2016.78>
- 893 Wojciechowska, J.A., Lewitin, E., Revina, L.P., Zalunin, I.A., Chestukhina, G.G., 1999.  
894 Two novel delta-endotoxin gene families cry26 and cry28 from *Bacillus*  
895 *thuringiensis* ssp. *finitimus*. *FEBS Lett.* 453, 46–48.  
896 [https://doi.org/https://doi.org/10.1016/S0014-5793\(99\)00650-X](https://doi.org/https://doi.org/10.1016/S0014-5793(99)00650-X)
- 897 Wood, J.M., 1988. Proline porters effect the utilization of proline as nutrient or  
898 osmoprotectant for bacteria. *J. Membr. Biol.* 106, 183–202.

- 899 <https://doi.org/10.1007/BF01872157>
- 900 Yen, A., Mittlefehldt, D., McLennan, S., Gellert, R., Bell, J., McSween, H., Ming, D.,  
901 McCoy, T., Morris, R., Golombek, M.P., Economou, T., Madsen, M., Wdowiak,  
902 T., Clark, B., Jolliff, B., Schröder, C., Brückner, J., Zipfel, J., Squyres, S., 2006.  
903 Nickel on Mars: Constraints on meteoritic material at the surface. *J. Geophys. Res.*  
904 v.111 111. <https://doi.org/10.1029/2006JE002797>
- 905 Yin, J., Chen, J.-C., Wu, Q., Chen, G.-Q., 2014. Halophiles, coming stars for industrial  
906 biotechnology. *Biotechnol. Adv.* 33.  
907 <https://doi.org/10.1016/j.biotechadv.2014.10.008>
- 908 Yoon, J.H., Jung, S.Y., Kim, W., Nam, S.W., Oh, T.K., 2006. *Nesterenkonia jeotgaki*  
909 sp. nov., isolated from jeotgal, a traditional Korean fermented seafood. *Int. J. Syst.*  
910 *Evol. Microbiol.* 56, 2587–2592. <https://doi.org/10.1099/ijs.0.64266-0>
- 911 Yue, H., Ling, C., Yang, T., Chen, X., Chen, Y., Deng, H., Wu, Q., Chen, J., Chen, G.-  
912 Q., 2014. A seawater-based open and continuous process for  
913 polyhydroxyalkanoates production by recombinant *Halomonas campaniensis* LS21  
914 grown in mixed substrates. *Biotechnol. Biofuels* 7, 108.  
915 <https://doi.org/10.1186/1754-6834-7-108>
- 916 Zuber, B., Haenni, M., Ribeiro, T., Minnig, K., Lopes, F., Moreillon, P., Dubochet, J.,  
917 2006. Granular layer in the periplasmic space of gram-positive bacteria and fine  
918 structures of *Enterococcus gallinarum* and *Streptococcus gordonii* septa revealed  
919 by cryo-electron microscopy of vitreous sections. *J. Bacteriol.* 188, 6652–6660.  
920 <https://doi.org/10.1128/JB.00391-06>

921

922 **Figure and table legends**

923 **Figure 1.** Phylogenetic analysis of *Nesterenkonia* strains. Strain *Nesterenkonia* sp.  
924 Act20 is in bold. (A) Maximum likelihood tree from the 16S rRNA gene. Black dots  
925 indicate that the gene was retrieved from a sequenced genome. (B) Heatmap based on  
926 whole-genome average nucleotide identity (ANI). *Act20* is distinct and inside the  
927 significant cluster.

928

929 **Figure 2.** The stacked bar chart shows the count of genes for all UV-resistome  
930 subcategories in colors, including the total count at the right end.

931

932

933 **Figure 3.** Scanning electron microscopy (SEM) micrographs of actinobacteria after  
934 exposure to UV-B radiation. **(A-D)** *Nesterenkonia* sp. Act20. **(E-H)** *Nesterenkonia*  
935 *halotolerans* DSM 15474. **(A, E)** Non-exposed growing bacterial cells (control). **(B, F)**  
936 Growing bacterial cells exposed to 0,17 Jls/cm<sup>2</sup> of UV-B (5 min). **(C, G)** Growing  
937 bacterial cells exposed to 0,51 Jls/cm<sup>2</sup> of UV-B (15 min). **(D, H)** Growing bacterial  
938 cells exposed to 1,04 Jls/cm<sup>2</sup> of UV-B (30 min). Black arrows indicate changes  
939 morphological, and white arrows indicate damage in cells (C) and pili deterioration (G).  
940 Scale bar 200 nm (E, F, G, H), 100 nm (A, B, C, D, E, F, H).

941

942 **Figure 4.** Transmission electron microscopy (TEM) micrographs of actinobacteria cells  
943 after exposure to UV-B radiation. **(A-D)** *Nesterenkonia* sp. Act20. **(E-H)** *Nesterenkonia*  
944 *halotolerans* DSM 15474. **(A, E)** Non-exposed growing bacterial cells (control). **(B, F)**  
945 Growing bacterial cells exposed to 0,17 Jls/cm<sup>2</sup> of UV-B (5 min). **(C, G)** Growing  
946 bacterial cells exposed to 0,51 Jls/cm<sup>2</sup> of UV-B (15 min). **(D, H)** Growing bacterial

947 cells exposed to 1,04 Jls/cm<sup>2</sup> of UV-B (30 min). Scale bar 200 nm principal figure and  
948 50 nm small box.

949 **Figure 5.** Comparison between the extreme conditions (relevant to Act20) of the Lake  
950 Socompa, Mars surface, and the early Earth environments. The light brown box  
951 represents the Act20 genome and its potential for the different resistances as described  
952 inside.

953

954

955 **Table 1.** Multi resistance profile of Act20 strain and comparison with *Nesterenkonia*  
956 halotolerans (NH)

957 **Table 2.** Group of genes potentially involved in the copper resistance reported for  
958 Act20.

959 **Table 3.** Group of genes potentially involved in the desiccation resistance reported for  
960 Act20.

961 **Table 4.** New functional traits (with no counterpart in other *Nesterenkonia*) of  
962 *Nesterenkonia sp. Act 20* unveiled by genome functional annotation and ortholog  
963 clustering.

964 **Table 5.** List of Act20's annotated enzymes and proteins with reported biotechnological  
965 potential.

966 Tables

967 Table 1.

|                    | Act20 | NH |
|--------------------|-------|----|
| Desiccation Period |       |    |



|                |     |   |
|----------------|-----|---|
| <b>7-days</b>  | +++ | + |
| <b>14-days</b> | ++  | + |
| <b>21-days</b> | -   | - |

| <b>Copper Concentration</b>   |     |     |
|-------------------------------|-----|-----|
| <b>1 mM</b>                   | +++ | +++ |
| <b>2 mM</b>                   | ++  | ++  |
| <b>3 mM</b>                   | +   | +   |
| <b>UV Dose</b>                |     |     |
| <b>1,7 KJ m<sup>-2</sup></b>  | +++ | ++  |
| <b>5.1 KJ m<sup>-2</sup></b>  | ++  | +   |
| <b>10.4 KJ m<sup>-2</sup></b> | +   | +   |

968

969

970 Table 2

| <b>Copper tolerance/resistance trait</b>  | <b>Function</b>                                                                                                                       |
|-------------------------------------------|---------------------------------------------------------------------------------------------------------------------------------------|
| <b>Copper-translocating P-type ATPase</b> | Probably similar to P-type ATPase CopA, a secretes Cu(I) from the cytoplasm to the homeostasis (Giachino and Waldron, 2020).          |
| <b>CopC domain protein</b>                | CopC is a bacterial blue copper protein that molecule. Along with CopA, CopC mediates copper in the periplasm (Arnesano et al., 2003) |

|                                                           |                                                                                                                                                               |
|-----------------------------------------------------------|---------------------------------------------------------------------------------------------------------------------------------------------------------------|
| <b>Putative CopD protein</b>                              | Exact function not known. Involved in copper copper uptake in conjunction with CopC (Swiss                                                                    |
| <b>CopZ</b>                                               | Chaperone that serves for the intracellular sequ from the cytosol to the periplasm (Giachino and                                                              |
| <b>Copper oxidase</b>                                     | Probably a periplasmic copper oxidase-like C the cytosol by converting periplasmic Cu(I) t inert, making it a relatively “safe” species for c Waldron, 2020). |
| <b>DsbD domain-containing protein</b>                     | DsbD (also known as CutA) oxidoreductase re incorrect disulfide bonds are inserted by toxic c                                                                 |
| <b>Four-helix bundle copper-binding protein</b>           | Cu(I) cytosolic storage. First found in meth amounts of copper to metabolize methane. Its what they are storing copper for remains unknow                     |
| <b>Fur family ferric uptake transcriptional regulator</b> | As toxic copper provokes mismetalation o regulator of iron metabolism is overexpressed t copper resistance even at low copper concentra                       |

971

972 Table 3.

| <b>Desiccation tolerance/resistance trait</b> | <b>Function</b>                                                                                                                     |
|-----------------------------------------------|-------------------------------------------------------------------------------------------------------------------------------------|
| <b>SugA-SugB-SugC</b>                         | ABC transporter complex particular for the Involved in the recycling of extracellular containing molecules (Kalscheuer et al., 2010 |
| <b>Trehalase</b>                              | Trehalose degradation. It may be nece                                                                                               |

|                                                |                                                                                                                                                                                                                                   |
|------------------------------------------------|-----------------------------------------------------------------------------------------------------------------------------------------------------------------------------------------------------------------------------------|
|                                                | intracellular trehalose (Carroll et al., 2007).                                                                                                                                                                                   |
| <b>opuBC-OpuBB-OpuBA</b>                       | High affinity multicomponent binding-prote osmoprotectant choline (Kappes et al., 1999)                                                                                                                                           |
| <b>ProX-ProW-ProV</b>                          | ABC transporter complex involved in the betaine and proline betaine (Gul and Poolma                                                                                                                                               |
| <b>Choline dehydrogenase</b>                   | Involved in the biosynthesis of the osmpr 1996).                                                                                                                                                                                  |
| <b>Betaine-aldehyde dehydrogenase</b>          | Involved in the biosynthesis of the osmpr reversible oxidation of betaine aldehyde to 1997).                                                                                                                                      |
| <b>HTH-type transcriptional regulator BetI</b> | Repressor involved in the biosynthesis of t represses transcription of the choline trans involved in the synthesis of glycine betaine (                                                                                           |
| <b>EctA-EctB-EctC-EctD</b>                     | Group of genes involved in the biosynt (Reshetnikov et al., 2006).                                                                                                                                                                |
| <b>Glycerol uptake facilitator protein</b>     | Transporter of the osmoprotectant glycerol (Hénin et al., 2008).                                                                                                                                                                  |
| <b>Phosphoglycerol transferase I MdoB</b>      | Participate in anionic polymers' biosynthe glucose units with an average charge of $-5$ potential across the outer membrane, resulti higher concentration in the periplasm than in to hydrostatic pressure in the periplasmic spa |
| <b>OsmC</b>                                    | The osmotically inducible expression of the kind of role in the bacterial osmotic-stress res                                                                                                                                      |

974 Table 4.

| Unique trait                                                                 | Function                                                                                                                                                                                                                      |
|------------------------------------------------------------------------------|-------------------------------------------------------------------------------------------------------------------------------------------------------------------------------------------------------------------------------|
| <b>Protein SphX</b>                                                          | High-affinity phosphate-binding protein inducible under stress (Gobler and Gobler, 2013)                                                                                                                                      |
| <b>Serine/threonine-protein kinase toxin HipA</b>                            | Toxin that induces bacterial persistence and is essential for survival under stress (Gobler, 2013).                                                                                                                           |
| <b>6-deoxy-6-sulfogluconolactonase</b>                                       | Sulfoquinovose degradation (Felux et al., 2015)                                                                                                                                                                               |
| <b>Trehalase</b>                                                             | Trehalose degradation (Carroll et al., 2007).                                                                                                                                                                                 |
| <b><math>\alpha</math>-xylosidase</b>                                        | Catalyzes the liberation of alpha-xylose from trehalose and xyloglucan oligosaccharides (Matsuzawa et al., 2007).                                                                                                             |
| <b>4-deoxy-L-threo-5-hexosulose-uronate ketol-isomerase</b>                  | Plays a role in the catabolism of hexuronate and is likely substituting for the regular hexuronate ketol-isomerase. Expression of this enzyme is repressed in these conditions (Rohde et al., 2010).                          |
| <b>Pleckstrin homology domain (bPH_1)</b>                                    | Appears to be involved in the bacterial cell cycle regulation (Rohde et al., 2010).                                                                                                                                           |
| <b>SMODS-associated and fused to various effectors sensor (SAVED) domain</b> | Senses nucleotide or nucleotide derivatives and is involved in the regulation of effectors deployed by a class of conflict systems. It is involved in the sensing of the nucleotide second messengers (Fischer et al., 2010). |
| <b>WxL domain</b>                                                            | Cell wall binding in gram-positive bacteria. It is involved in the binding to peptidoglycan (Brinster et al., 2007).                                                                                                          |
| <b>EthD domain</b>                                                           | Related to the EthD protein, which is involved in the regulation of ether (ETBE) (Chauvaux et al., 2001)                                                                                                                      |
| <b>Coronavirus endopeptidase C30</b>                                         | Involved in viral polyprotein processing in replication (Cramer et al., 2015)                                                                                                                                                 |

976 Table 5.

| Trait                                           | Biotechnological applications                                                                                                                                                                                                                                                                                                                                                                                                                     |
|-------------------------------------------------|---------------------------------------------------------------------------------------------------------------------------------------------------------------------------------------------------------------------------------------------------------------------------------------------------------------------------------------------------------------------------------------------------------------------------------------------------|
| <b>Alpha-xylosidase</b>                         | Although $\alpha$ -xylosidases are relevant for the degradation of xylan saccharides, only a few $\alpha$ -xylosidases have been characterized. Unclear aspects regarding the properties of the enzyme are still present (Matsuzawa et al., 2016). Before $\alpha$ -xylosidase can be used, it is necessary to study its properties, and N. Act 20 is particularly interesting, especially from the fact that N. Act 20 $\alpha$ -xylosidase is a |
| <b>1,4-beta-xylanases</b>                       | Xylanases are used in the paper industry to improve the bleaching agents (hydrogen peroxide, ozone, chlorine) efficiency in the hemicellulose, reducing the amounts of bleaching agents, decreasing process cost and increasing its eco-friendliness. They are also used in the clarification of fruit juices and wines for improving the texture of bread. Furthermore, xylanases are used as food additives (Qeshmi et al., 2020).              |
| <b>Xylose isomerase</b>                         | Usable in microbial cell factories or biorefineries for the production of fuels, chemicals, and other industrial derivatives.                                                                                                                                                                                                                                                                                                                     |
| <b>Chitinase (glycosyl hydrolase family 18)</b> | Chitinases are suitable for 1) waste treatment, 2) production of chitooligosaccharides and GlcNAc (which are used in the production of single-cell proteins for usage as food additives), 3) post-harvest fungal pathogens, and 5) functional foods. They are used for example as a treatment for various fungal diseases.                                                                                                                        |
| <b>Exo-alpha-sialidase</b>                      | Synthesis of sialylated glycoproteins. Sialic acid is an important component of the half-life of glycoproteins in circulation. Thus, it is used in the                                                                                                                                                                                                                                                                                            |

|                                                                                               |                                                                                                                                                                                                                                                                                                                                                                                                                                       |
|-----------------------------------------------------------------------------------------------|---------------------------------------------------------------------------------------------------------------------------------------------------------------------------------------------------------------------------------------------------------------------------------------------------------------------------------------------------------------------------------------------------------------------------------------|
|                                                                                               | <p>monosaccharides such as galactose are recognized by various organs, and the glycoprotein is rapidly cleared. This has practical relevance for pharmacology because many drugs (antibodies, cytokines, and hormones) are glycosylated (2008).</p>                                                                                                                                                                                   |
| <b>Alpha-L-arabinofuranosidase</b>                                                            | <p>Among the functions of microbial <math>\alpha</math>-arabinofuranosidase: 1) Increase digestibility in the animal feed industry, 2) increase texture, and delay staling of bread, 3) increase yield in the industry, 4) serves in the clarification of juice, 5) reduce sugar content in bioethanol industry, 6) reduce production, antiglycemic agent production, 7) reduce sweetener production, and mycobacterial diseases.</p> |
| <b>Cellulose synthase/poly-beta-1,6-N-acetylglucosamine synthase-like glycosyltransferase</b> | <p>These enzymes have critical roles in bacterial cellulose synthesis, a malleable material that makes of it of enormous importance in science, specially designing celluloses with tailored properties.</p>                                                                                                                                                                                                                          |
| <b>Cellulose biosynthesis protein BcsQ</b>                                                    | <p>Native BC does not require any purification and has a number of biomedical applications. Advancements in regenerative medicine led to his usage in artificial skin and hemostatic materials. One of the most exciting applications is as wound healing scaffolds. BC is also applied in cosmetics.</p>                                                                                                                             |
| <b>Cellulose synthase</b>                                                                     | <p>Regarding to the cosmetic area, BC is extensively used as a powder in facial scrubs in association with other ingredients. Application in cosmetic is the production of cosmetic products with high light transmittance, and permeability to liquid. The use of BC can be used also in drug delivery for</p>                                                                                                                       |

|                                           |                                                                                                                                                                                                                                                                                                                                                                                                                                                                            |
|-------------------------------------------|----------------------------------------------------------------------------------------------------------------------------------------------------------------------------------------------------------------------------------------------------------------------------------------------------------------------------------------------------------------------------------------------------------------------------------------------------------------------------|
|                                           | <p>key role also in the food industry being used as<br/>beverages (due its ability to acquire flavors<br/>additive, it is used worldwide for its gelling<br/>hydrogel-like texture could be a new material<br/>Finally, BC is also applicable to bioremediati<br/>mercury and arsenic has been proved (Gullo et :</p>                                                                                                                                                      |
| <b>Colicin V production protein</b>       | <p>Colicin V (colV) is a secreted peptide antibio<br/>reducing competition for nutrients (Gérard e<br/>production of colV by an <i>Enterobacter</i> sp. stra<br/><i>Fusarium</i> wilt in finger millet (Mousa et al., 201</p>                                                                                                                                                                                                                                              |
| <b>Aurachin C monooxygenase/isomerase</b> | <p>This enzyme catalyzes the initial step in col<br/>Aurachins are quinoline alkaloids that act as a<br/>They have been reported to exhibit antimicro<br/>positive bacteria (Gerhard Hofle et al., 1987; O</p>                                                                                                                                                                                                                                                             |
| <b>Protein Cry26Aa</b>                    | <p>Promotes colloidosmotic lysis by binding to t<br/>having the potential to be used as a pesticidal (</p>                                                                                                                                                                                                                                                                                                                                                                 |
| <b>Hemoglobin</b>                         | <p>Heterologous expression of bacterial hemoglo<br/>beneficial for mycelium forming microorganis<br/><i>Streptomyces</i> strains, <i>Acremonium crysogenur</i><br/>It is known that oxygen transfer to the myceli<br/>critical when such microorganisms are grown i<br/>such situations, BHb expression seems to enha<br/>improved the bioremediation capacity of Burk<br/>rate of 2,4-DNT degradation, where oxygen<br/>degradation pathway. Moreover, heterologous ]</p> |

|                                                                             |                                                                                                                                                                                                                                            |
|-----------------------------------------------------------------------------|--------------------------------------------------------------------------------------------------------------------------------------------------------------------------------------------------------------------------------------------|
|                                                                             | oxygen limitation in a wide range of distinct productivity (Frey and Kallio, 2003).                                                                                                                                                        |
| <b>Ornithine cyclodeaminase</b>                                             | Can be used for biotechnological production overexpressed in <i>C. glutamicum</i> (Jensen and W                                                                                                                                            |
| <b>Molybdate-binding protein (Molybdate/tungstate-binding protein ModA)</b> | It may be useful in radiopharmaceutical applications. <b>ModA</b> is a chromate-binding protein with increased affinity for chromate. It may be used to remove chromate, which is toxic in environmental aqueous solutions (Karpus et al., |



**A**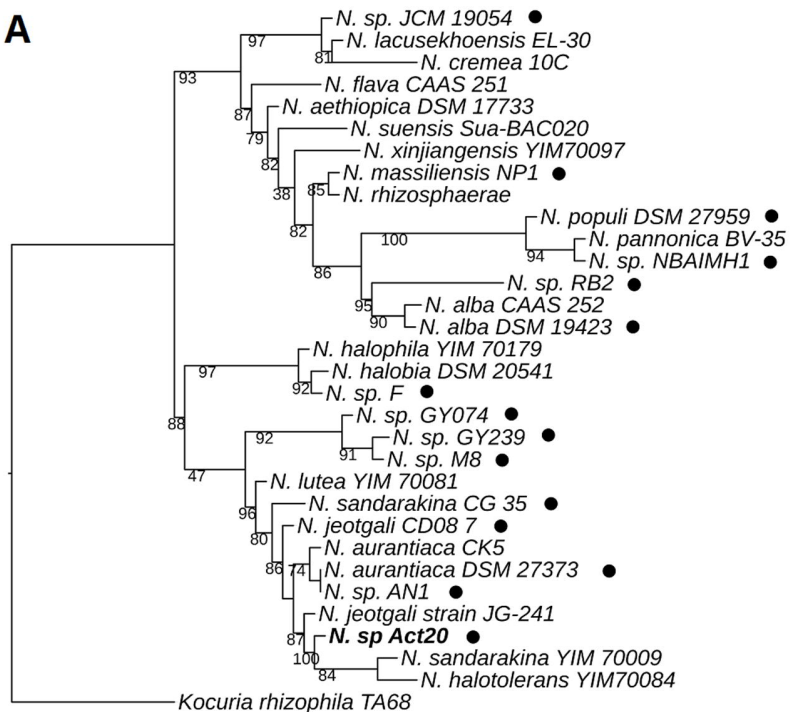**B**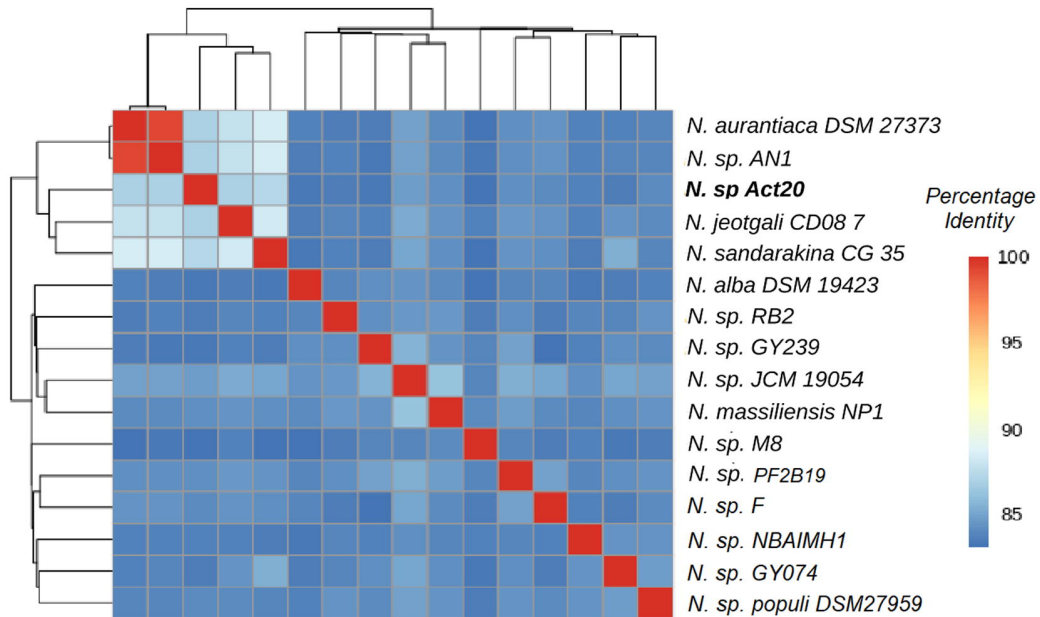

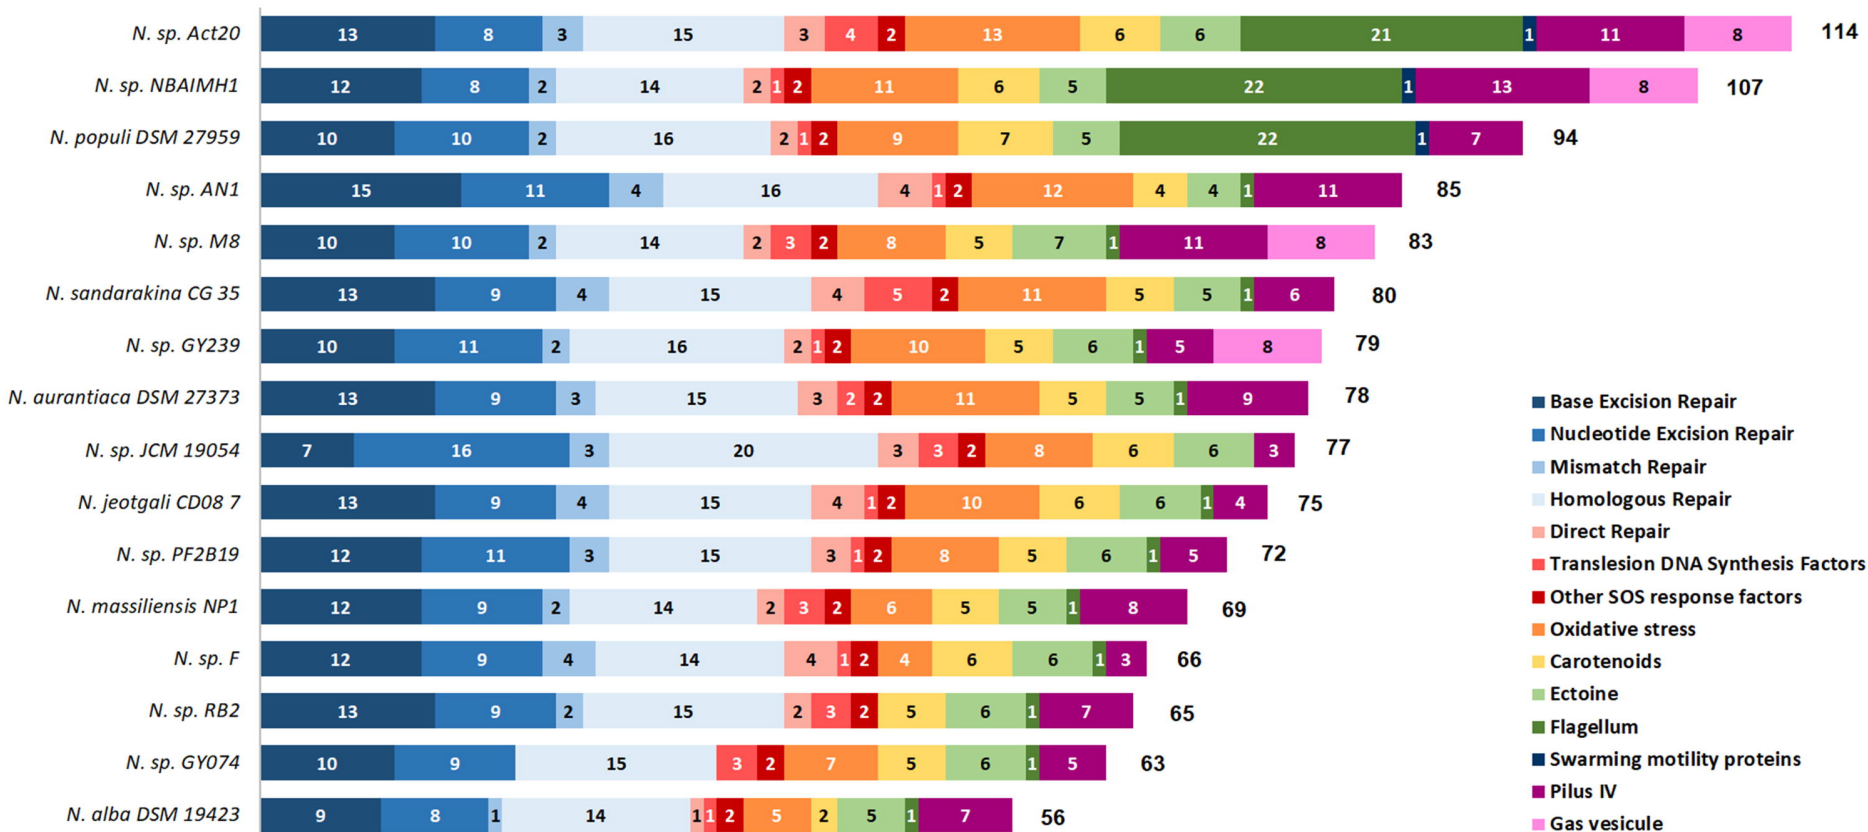

**A**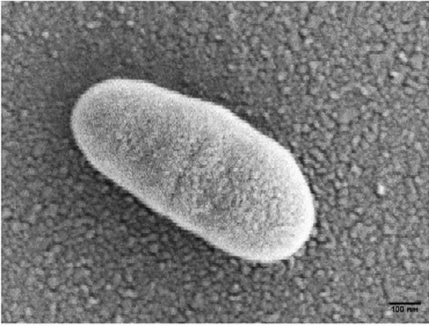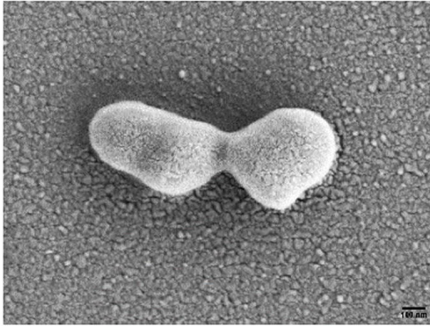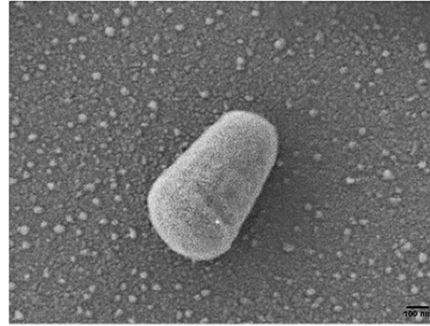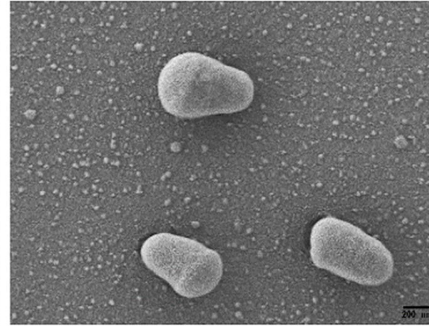**E****B**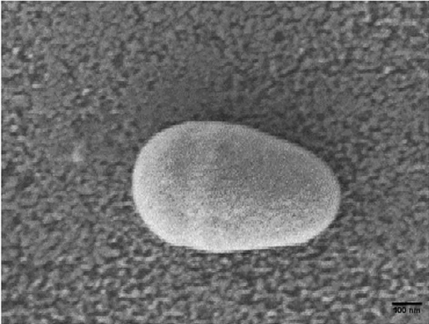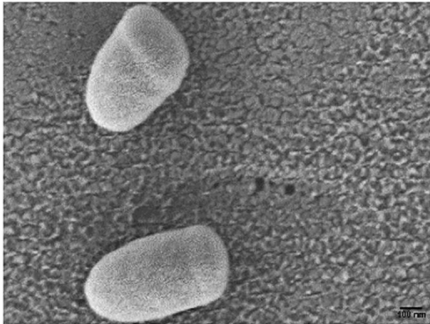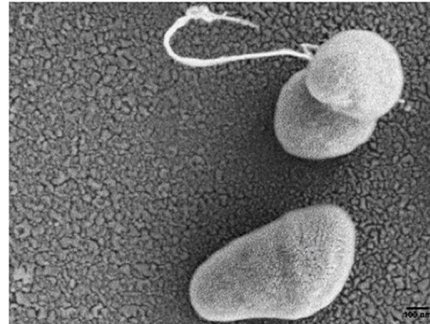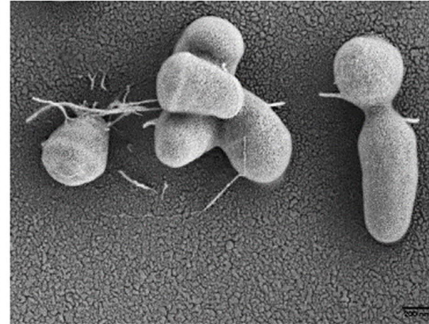**F****C**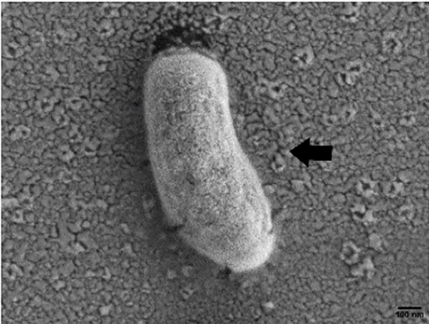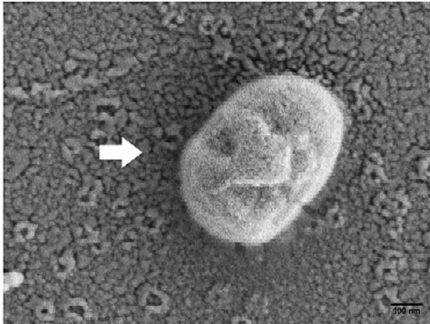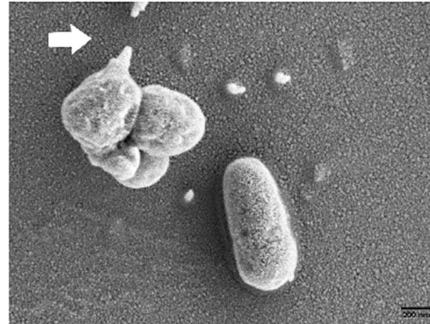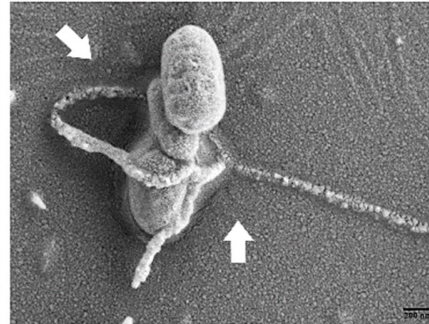**G****D**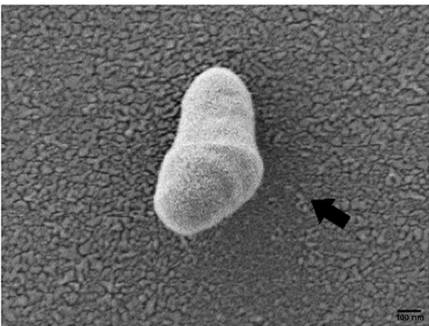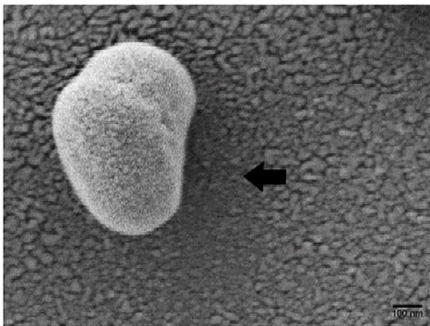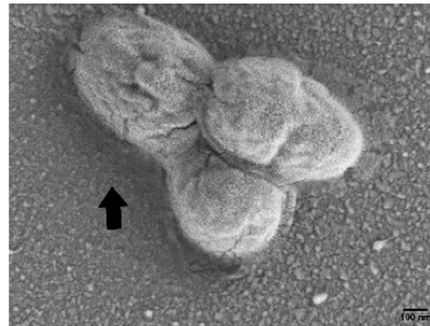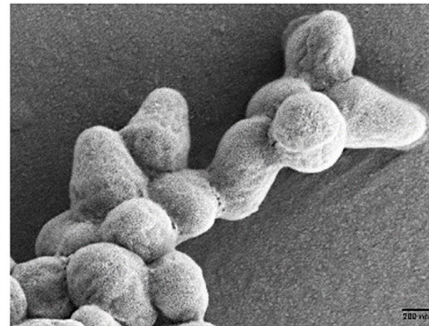**H**

**A**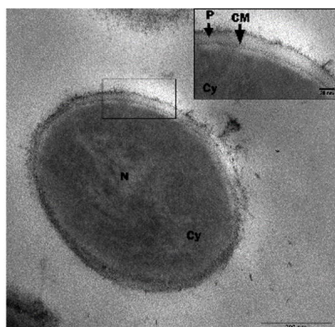**E**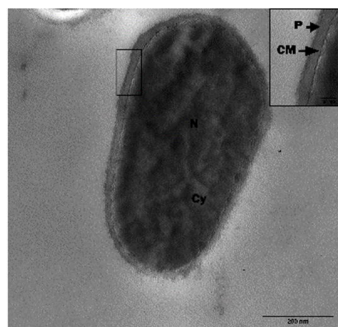**B**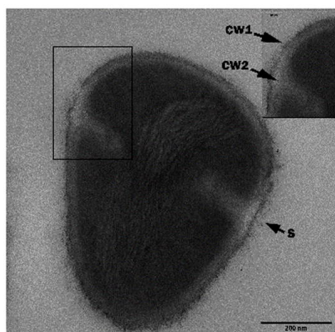**F**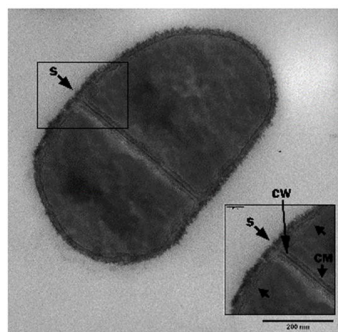**C**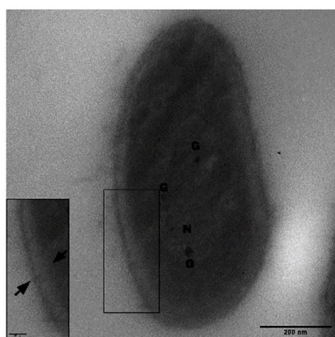**G**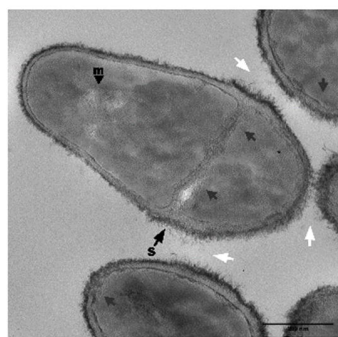**D**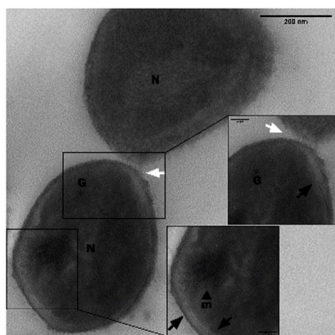**H**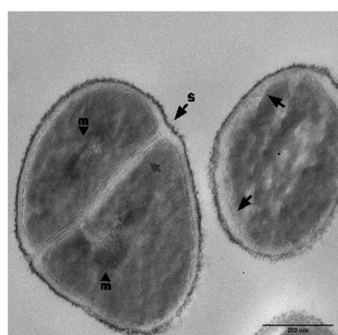

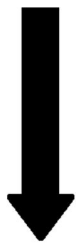

High UV  
 High arsenic content  
 Heavy metal content  
 Hypoxia  
 -20 °C to 20 °C  
 Hypersalinity  
 Low nutrient availability

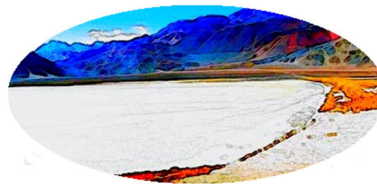

Lake Socompa  
 (surrounding soil)

Martian surface

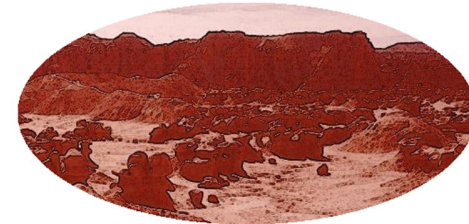

High UV  
 High heavy metal content  
 Perchlorates  
 Fluorine containing minerals  
 Hypersalinity  
 -140 °C to 30 °C

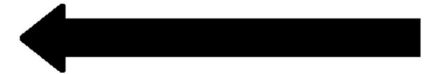

**UV-resistome**

Base Excision Repair  
 Nucleotide Excision Repair  
 Mismatch Repair  
 Homologous Repair  
 Direct Repair  
 Translesion DNA Synthesis Factors  
 Oxidative Stress  
 Ectoine + Carotenoids  
 Flagellum + Swarming Motility  
 Pilus IV  
 Gas Vesicle

**Heavy metal resistance**

Copper, cobalt, zinc, chromate, cadmium

**Arsenic resistance**

arsenate reductase  
 arsenate-mycotoxin transferase  
 arsenic transporter

**Fluoride resistance**

Resistance protein CrcB

**Osmoprotection**

Specific ABC transporters  
 Synthesis of osmoprotectants  
 Trehalase degradation

**Nutrient starvation resistance**

Phosphate and Phosphonate ABC transporters  
 Phosphate limitation Two-Component System  
 Phosphate starvation inducible proteins PhoH and SphX  
 Carbon starvation protein CstA

**Oxygen uptake optimization**

Hemoglobin

**Cold resistance**

Cold-shock proteins

**Perchlorate respiration ?**

Chlorite dismutase

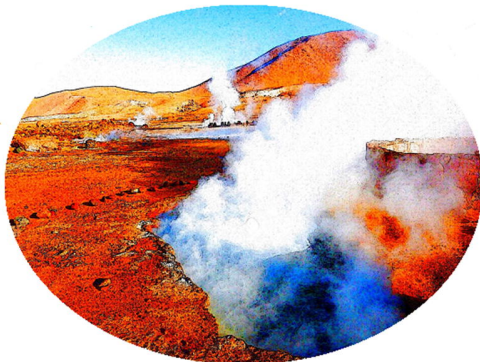

Early Earth

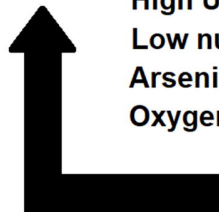

High UV  
 Low nutrient availability  
 Arsenic cycling in oceans ? Sforma *et al.* 2014  
 Oxygen gradually increasing during proterozoic
